# Supplementary material for: Gut microbiome composition is linked to Mediterranean diet adherence and blood glucose control in adults with type 1 diabetes
Source: Research Square preprint supplement (doi:10.21203/rs.3.rs-5541931/v1), 2024-12-10
Supplement: Supplementary file 1 [file 7b081b53009f8b7bf25208dc.xlsx]

## Sheet: Sheet1
Supplementary Data 1. Subject metadata
Sample_id	Sex	Age (years)	Diabetes duration	BMI	HbA1c	Fasting plasma glucose	Total cholesterol	Triglycerides	LDL cholesterol	HDL cholesterol	Therapy	TAR>250 mg/dl (%)	TAR180_250 mg/dl (%)	TIR 70_180 mg/dl (%)	TBR54-70 mg/dl (%)TBR_70_50	TBR<54 mg/dl (%)	Water	Energy from total protein (%)	Energy from animal protein (%)	Energy from plant protein (%)	Energy from total fats (%)	Energy from animal fats (%)	Energy from plant fats (%)	Energy from saturated fat (%)	Energy from oleic acid (%)	Energy from monounsaturated fatty acid (%)	Energy from linoleic acid (%)	Energy from linolenic acid (%)	Energy from polyunsaturated fatty acid (%)	Energy from carbohydrates (%)	Starch (%)	Energy from simple sugar (%)	Fiber (g/1000 Kcal)	Alcohol (g)	Energy (Kcal)	Energy (KJ)	Iron (mg/1000Kcal)	Calcium (mg/1000Kcal)	Sodium (mg/1000Kcal)	Potassium (mg/1000Kcal)	Phosphorus (mg/1000Kcal)	Zinc (mg/1000Kcal)	Thiamin (mg/1000Kcal)	Riboflavin (mg/1000Kcal)	Niacin (mg/1000Kcal)	Vitamin C (mg/1000Kcal)	Vitamin B6 (mg/1000Kcal)	Folic acid (μg/1000Kcal)	Retinol equivalent (μg/1000Kcal)
9	M	58	28	33.5	7.5	137	199	85	120	62	closed-loop	5	20	75	0	0	1005.59	21.2894	16.5022	4.78716	36.2435	19.2225	17.0284	11.2291	15.8685	16.8215	3.67902	0.295503	4.5212	42.2012	25.0685	17.1326	13.3551	5.34	1218.26	5125.81	7.207	442.935	1388.41	1983.58	870.118	5.73769	0.435047	0.935761	21.3173	59.4947	1.09172	142.055	283.962
10	M	36	24	27.5	7.8	171	238	92		44	closed-loop	4	30	65	1	0	1031.79	14.7246	9.79148	4.92851	37.1215	14.0312	23.1555	10.6057	16.8189	17.9847	4.44731	0.500623	5.51371	49.5076	29.3958	20.0859	10.5611	6.23	2624.73	11033.8	5.4558	451.715	888.023	1341.87	670.343	5.01385	0.525768	0.704834	12.4775	50.569	1.13154	151.406	347.659
11	F	31	27	32.4	9.1	142	195	56	116	68	closed-loop	4	23	69	3	1	543.73	17.9562	12.5643	5.38942	33.7235	20.9536	12.8101	11.1894	13.6722	14.9997	3.81027	0.293098	4.90795	51.5367	37.021	14.4544	9.32932	0	1566.03	6593.1	5.19147	222.742	1707.14	1223.48	557.282	5.60653	0.421448	0.568316	12.7456	26.0148	0.810968	105.566	353.116
12	M	38	7	25.2	6.3	125	194	48	127.4	57	closed-loop	3	16	74	6	1	1214.01	17.9032	12.4864	5.41481	31.467	19.7354	11.7579	11.179	10.6176	11.8149	4.98209	0.249982	5.96009	52.7739	33.3231	19.4099	9.58507	3.46	2052.15	8652.3	5.97422	516.746	1290.15	1493.5	755.637	5.77443	0.433691	0.882002	12.3432	31.718	0.706576	105.558	259.713
13	F	31	15	19.6	8.1	197	137	61	70.8	54	multi-iniettiva	4	36	59	1	0	974.77	15.9136	9.34931	6.56431	34.2922	20.0388	14.2585	11.9808	13.8029	14.9519	3.82656	0.359372	4.65666	53.1466	37.4512	15.6707	13.7169	0	1778.1	7488.26	5.69147	436.876	1050.41	1454.42	643.693	5.01659	0.613014	0.961701	10.2975	44.6207	1.05731	172.555	280.187
14	F	25	8	23.9	7.2	121	143	47	67.6	68	open-loop	13	26	60	1	0	1133.03	20.4908	14.728	5.74971	36.6544	18.4872	18.2261	11.0081	14.3518	15.3836	5.89991	0.362165	7.15064	45.7375	33.5681	12.1208	9.7747	0	2137.15	8996.36	5.9191	510.83	1157.78	1480.43	819.699	5.81616	0.43048	0.743981	11.4592	45.6636	0.837564	141.81	345.203
15	M	71	41	25.7	6.4	180	159			58	open-loop	3	27	66	4	0	898.11	17.3654	12.7589	4.60654	40.1074	20.9526	19.2169	13.3526	17.2084	18.5536	3.47763	0.316148	4.81041	38.858	23.8289	14.9464	10.0492	12.56	1451.85	6093.32	6.40562	477.074	985.846	1615.64	794.979	4.65613	0.296174	0.592348	10.9653	53.9587	0.640562	116.851	465.489
16	M	47	38	28.3	7.7	168	172	71	111.8	46	closed-loop	7	23	68	1	1	1064.4	18.0025	11.7622	6.21184	35.7499	17.8942	17.9284	10.3499	14.5882	15.5291	5.97471	0.316484	7.06957	48.193	37.0657	11.1178	11.3573	3.21	2104.37	8858.89	6.17762	449.042	1483.73	1529.11	741.433	5.19871	0.418177	0.68429	13.4577	45.0158	0.750819	139.03	223.791
17	M	21	9	22.2	6.9	269	136	72	61.6	60	multi-iniettiva	22	21	52	5	0	1089.73	15.9618	9.30106	6.64761	33.441	14.6059	18.8498	9.90364	16.5911	17.5929	2.84651	0.362283	3.69307	51.1074	37.0843	13.9951	11.2957	9.32	2434.56	10251.7	5.74231	257.895	974.25	1605.47	591.778	5.88607	0.51344	0.653095	10.466	77.5089	1.00223	166.363	425.551
18	F	31	24	26.5	5.3	71	175	60	95	68	open-loop	0	8	71	15	6	1462.14	14.1598	10.0377	4.12034	32.3293	13.4023	18.9712	10.1902	14.4181	15.2693	3.16387	0.232874	3.999	51.9709	20.2912	31.6654	8.78852	15.59	2241.56	9436.75	4.8493	454.371	685.96	1564.04	665.586	3.56894	0.468424	0.932386	13.8966	61.9836	0.976998	157.939	224.995
19	F	39	35	20.7	8	206	187			71	closed-loop	8	21	65	3	3	784.63	19.4849	15.1774	4.29661	35.0949	19.605	15.5022	12.075	13.9544	14.9617	3.86941	0.417651	4.96267	46.7932	18.4749	27.7942	10.7961	1.74	732.67	3086.72	5.39124	859.091	1086.21	2578.32	988.89	6.3876	0.5323	1.55595	15.8871	124.121	0.996356	173.038	658.168
20	F	19	12	26.3	7.3	229	166	46	106.8	50	open-loop	8	39	52	1	0	983.08	20.5318	15.4426	5.07978	44.0072	18.836	25.2389	11.7005	20.8517	22.0713	4.92497	0.470053	6.11916	37.7925	23.9666	13.8089	11.7349	0	2125.29	8917.04	6.61557	365.974	1103.53	1579.01	736.944	6.6438	0.597566	0.701081	12.9394	52.2564	1.22807	161.954	558.23
21	F	33	6	26.2	8	125	140		77	56	closed-loop	3	23	72	1	1	1209.31	19.6998	14.6546	5.04122	44.1036	19.0774	25.0713	12.7138	19.5059	20.8048	5.50224	0.487084	6.7425	35.7355	21.4557	14.2196	9.54123	6.94	1995.55	8368.46	5.49222	547.493	1494.19	1521.23	769.247	6.08855	0.476059	0.591316	12.2623	58.9161	0.861918	141.46	321.365
22	F	66	11	26.5	9.8	127	243		154	70	open-loop	21	35	44	0	0	1001.02	21.0125	16.9663	4.03822	50.4097	27.4422	22.9735	14.5174	20.4004	22.2247	6.13854	0.534819	8.4442	30.4887	14.3279	16.1238	9.59374	0.19	1514.53	6337.9	6.61591	396.915	1251.62	1772.15	781.589	6.12071	0.600846	0.937585	18.2829	69.7576	1.28093	179.858	462.526
23	F	52	16	27.3	7.1	135	175	51	96.8	68	closed-loop	6	24	68	2	0	909.28	15.4413	8.79388	6.63987	36.6307	16.2302	20.4681	10.8709	16.3993	17.3799	4.16463	0.33813	4.99869	48.7708	34.4416	14.239	12.7863	4.82	1597.02	6717.82	6.23662	408.93	1117.78	1578.45	657.612	5.26606	0.388223	0.557288	10.0437	71.7023	0.707568	173.605	429.112
24	F	44	25	30.2	12.1	155	205		123	77	open-loop						1409.09	12.4607	7.08727	5.3631	37.7567	13.9418	23.868	10.5046	16.8605	18.0041	5.80079	0.319127	6.73822	52.6086	31.8654	20.6265	10.2313	1.5	2707.39	11386	4.60222	282.778	1059.14	1410.27	488.892	3.81918	0.32873	0.402602	8.09636	75.2459	0.771961	123.292	356.21
25	F	57	6	23.9	6.9	269	190	74	119.2	56	closed-loop	31	37	32	0	0	959.14	14.5497	7.68429	6.85668	33.1053	14.2926	18.8422	9.86576	15.6339	16.533	3.52278	0.309533	4.20081	55.764	38.8625	16.8316	13.4841	0	1831.79	7713.96	6.41995	389.433	1368.91	1540.31	583.893	4.62389	0.403976	0.709688	11.2786	65.0347	0.709688	164.178	443.954
26	M	26	16	23.3	7.7	135	171	41	111.8	51	open-loop						708.92	17.8698	13.5768	4.25581	34.8466	18.9195	16.0043	10.9398	13.1407	14.0995	5.4313	0.353935	6.31936	50.3547	30.417	19.9062	8.83051	0	1398.56	5887.33	4.75489	377.424	949.112	1412.37	676.789	6.27074	0.421862	0.550566	8.08689	36.9666	1.07968	106.138	304.213
27	M	26	13	27.6	6.2	155	168	53	85.4	78	open-loop	8	19	69	4	1	1685.29	15.5892	11.0285	4.55493	37.3279	21.7075	15.6593	13.174	15.4069	16.8178	3.30402	0.349494	4.43017	43.8997	24.4977	19.3804	8.15128	23.34	2781.16	11683.8	4.99432	501.424	834.99	1395.39	737.66	4.5197	0.341584	0.553726	9.02861	55.8724	0.693955	125.387	503.624
28	F	34	30	27.9	6.7						closed-loop	3	21	75	1	0	1381.04	18.159	12.0663	6.07694	45.7236	15.194	30.5498	10.4948	21.495	22.3691	6.73045	0.631611	8.02398	36.2303	20.883	15.2867	13.5024	5.45	1781.16	7464.39	6.48454	337.527	1258.06	1876.73	735.145	5.92872	0.583889	0.999349	13.6091	62.5267	1.00496	175.745	480.838
29	M	32	23	24	8.1	88	136	55	83	42	open-loop	28	23	46	2	1	1320.83	19.0986	14.2867	4.8106	38.297	23.3505	14.9862	13.6954	16.1885	17.5617	3.2499	0.296	4.33931	43.9437	29.3152	14.6108	9.26654	5.45	2949.32	12391.9	4.7299	512.755	1318.58	1257.77	717.993	5.53687	0.433998	0.478076	10.2329	57.8371	0.847653	121.055	558.193
30	M	22		28.1	7.3	85	113	98	56.4	37	multi-iniettiva						1249.05	16.8748	10.6492	6.19821	27.5191	15.4404	12.0963	8.29125	11.4768	12.475	3.87845	0.237816	4.69759	59.0879	44.5449	14.5325	7.15404	0	3065.4	12946.5	4.25067	188.98	944.748	1034.19	550.959	5.48379	0.407777	0.378417	8.85039	21.4784	0.760097	98.5124	154.43
31	M	18		21.3	5.9	119	175	85	108	50	multi-iniettiva	3	17	80	0	0	1226.97	13.6941	5.79288	7.89368	35.6317	9.45642	26.1866	7.37538	18.8112	19.678	5.36494	0.316249	6.05956	53.4813	44.1732	9.29296	12.4241	2.12	3187.36	13422.3	5.75084	203.115	588.882	1318.69	539.807	5.01669	0.464334	0.489433	8.3737	48.3755	0.771799	144.649	754.242
32	F	57	16	24.8	7.1	175	183	62	92.6	78	closed-loop	9	29	61	1	0	1734.2	18.5019	13.4166	5.08531	39.266	19.8716	19.4059	11.148	16.4394	17.5581	3.70326	0.301606	4.75316	41.5868	25.2755	16.2367	10.0705	11.25	2357.38	9908.81	6.00243	711.642	1065.48	1984.4	886.145	8.47975	0.373296	0.46662	10.4989	69.1403	0.848399	189.49	378.225
33	M	19	12	25.8	6.8	109	113	63	66.4	34	closed-loop	4	13	83	0	0	1195.84	16.335	10.3694	5.94754	31.9861	18.174	13.9176	10.6512	12.753	13.9947	3.9521	0.223168	4.77985	53.7551	35.4616	18.2863	12.29	4.06	2218.06	9350.19	5.34251	417.144	1357.51	1482.4	623.157	4.63017	0.369692	0.599623	10.3739	79.6913	0.680775	148.603	303.107
34	M	47	33	23	6.4	80	161	68	104.4	53	open-loop	2	9	85	3	1	1439.53	17.1348	10.8244	6.31039	45.9751	13.037	32.9464	10.756	23.9761	24.9085	4.90345	0.645191	6.1647	37.8494	22.4739	15.3125	12.6494	4.2	2162.15	9071.43	5.85528	513.424	755.442	1790.93	771.473	5.23553	0.485628	0.878755	14.0185	63.2889	0.92038	170.816	417.122
35	M	63	17	25.7	7.6	128	157	241	69.8	39	open-loop	16	34	49	1	0	934.73	19.7045	14.1599	5.5318	38.3884	20.266	18.1627	11.9164	16.63	17.6787	4.41391	0.282352	5.31859	44.4131	30.5452	13.8525	11.691	0.86	1561.88	6569.78	5.33972	505.564	1267.55	1659.86	817.259	6.06321	0.40336	0.633852	11.0508	64.7937	0.691474	148.296	340.737
36	F	43	13	22.5	6.7	134	149	49	76.2	63	closed-loop	3	16	75	5	1	0.44	16.0112	8.57757	7.42686	34.2481	15.0482	19.2344	9.5521	14.4392	15.2512	5.15522	0.478754	6.25827	51.9608	34.9776	16.7892	14.5371	3.73	2349.85	9899.16	7.64304	404.06	1354.79	1451.82	748.767	5.41737	0.514926	0.697917	11.8476	29.0444	0.855374	130.821	189.016
37	M	31	4	32.7	6.9	176	172	61	111	67	multi-iniettiva	5	28	65	2	0	926.57	17.4408	12.185	5.25145	40.69	22.7234	18.055	12.1692	15.9392	17.3972	6.06742	0.373077	7.50082	41.453	27.7299	13.7122	9.03785	7.91	1833.4	7701.49	6.69794	324.07	1194.58	1404.17	703.802	6.08705	0.419985	0.779972	18.4793	27.2717	0.7527	115.965	236.768
38	F	37	30	29.1	7.6	242	195	59	155	53	open-loop	9	40	49	1	1	1673.8	15.1281	10.3774	4.74942	41.5469	19.2776	22.3106	12.2351	18.3689	19.7379	4.69402	0.433702	5.88301	38.0871	25.3534	12.7154	8.71666	32.72	3050.48	12787.5	5.56306	292.911	1179.28	1400.74	644.145	4.00265	0.295036	0.409772	9.81485	60.2004	0.662191	137.057	399.078
39	F	57	30	25	7	138	181	104	101	60	closed-loop	2	18	77	3	0	932.92	18.3922	12.4096	5.97384	46.3224	18.2384	28.1087	13.1998	20.4154	21.5974	6.41767	0.522082	7.53571	37.7366	25.6137	12.0681	11.465	0	1827.3	7665.06	6.24966	549.959	1194.74	1620.54	831.352	6.11284	0.51442	0.788048	11.6073	51.037	0.924862	152.394	358.622
40	M	45	15	34.3	7	105	159	69	112	47	closed-loop	11	26	58	4	1	1425.28	16.5613	12.36	4.19449	37.2324	22.1429	15.1352	11.9322	15.5199	16.7653	4.28082	0.319919	5.27866	37.786	24.0024	13.7633	8.90779	33.75	2363.1	9911.93	6.2545	358.901	1007.49	1495.48	614.096	5.74669	0.351234	0.706699	10.6978	46.9807	0.761711	126.364	1241.39
41	F	29	21	21.2	6.8						closed-loop	1	12	85	2	0	1333.63	13.8404	9.10467	4.72638	40.8692	18.8384	22.0519	15.0173	17.2545	18.1009	4.39	0.273936	5.18372	43.1602	22.4316	20.7021	8.08931	17.61	2562.64	10758.7	5.57628	371.738	1137.78	1455.93	611.237	4.10904	0.370711	0.639965	10.5399	36.6302	0.68289	102.41	426.9
42	F	70	30	17.1	8.5	112	186	37	80.6	98	closed-loop	1	7	92	0	0	1072.81	15.8755	7.57108	8.30683	38.4488	9.02478	29.4774	7.41741	17.2112	18.0015	7.35333	0.683533	8.53349	48.7635	32.7052	16.0108	17.1417	0	1685.36	7089.28	6.92434	365.056	1059.96	1696.6	672.948	5.37571	0.51621	0.557744	11.9678	68.5907	1.02055	165.247	261.084
43	M	36	22	25.7	6.5	94	127	79	82	39	closed-loop	0	5	94	1	0	1107.32	19.7067	12.9843	6.67884	32.6029	16.0588	16.5581	9.0771	13.94	15.2561	3.12681	0.331349	4.87223	51.0475	29.8245	21.2063	11.9524	0	1928.48	8129	5.60027	361.943	1102.27	1501.69	691.695	5.72472	0.471874	0.497801	12.3102	54.3329	1.00079	145.835	157.637
44	F	32	29	22.7	6.7		133	51	56.8	66	closed-loop	3	22	73	2	0	872.79	15.0498	10.0308	4.99495	34.8463	17.5665	17.3231	11.8227	15.2517	16.2576	3.35861	0.265011	4.29426	52.6754	31.4865	21.1624	8.73155	1.61	1664.08	7008.95	4.7654	464.305	975.458	1384.55	661.398	4.54305	0.396616	0.751166	10.0236	42.3597	0.697082	120.259	318.891
45	M	79	43	20.7	7.4	127	152	60	74	66	open-loop						812.74	18.5297	12.5707	5.7183	31.8492	21.2614	10.6092	10.7486	11.8583	12.9466	3.71511	0.337737	4.86234	52.8848	36.061	16.6569	10.1321	0	1678.82	7077.41	5.13456	229.989	705.841	1346.33	646.454	5.71235	0.446742	0.619483	12.616	31.6234	0.822006	90.0216	201.725
46	M	26	18	25.8	8.3	233	194	42	115.6	70	open-loop	12	33	53	2	0	1533.04	16.1479	10.5016	5.63728	36.5523	17.2501	19.3426	10.6343	16.3666	17.6009	3.89729	0.444251	5.17199	46.1068	31.0763	14.9643	10.0237	20.15	3565.55	14983.3	5.27548	296.63	1191.72	1306.26	616.037	4.82114	0.40106	0.465566	10.9885	47.5354	0.863822	126.062	319.533
47	M	21	19	29.3	8.6	139	118	98	58.4	40	multi-iniettiva	33	38	29	0	0	334.13	20.3237	13.0146	7.2973	28.9486	22.9878	5.98084	10.1908	11.1464	12.3025	3.15414	0.300713	4.19661	52.2899	49.4624	2.80665	7.97446	3.21	1346.8	5679.7	6.10336	241.87	1841.57	1162.04	654.99	5.68013	0.497475	0.4158	10.0238	25.2376	0.846451	121.681	200.49
48	F	52	22	25.7	9.1	185	174	81	95.8	62	open-loop	17	25	57	1	0	1077.74	19.7967	14.8175	4.96957	33.1989	17.0586	16.1727	10.6144	13.9148	14.9033	3.56513	0.22147	4.45641	50.2695	25.8586	24.3461	15.2568	0	1666.14	7022.06	7.12425	551.916	1490.76	1750.84	846.988	6.58408	0.510161	0.810256	13.9004	52.3665	0.984311	141.027	317.458
49	F	32	21	29.4	8.2	81	202	84	119.2	66	multi-iniettiva	13	27	56	4	0
50	F	66	42	24.7	7.6	50	171	65	94	64	closed-loop	11	22	64	3	1	1025.85	14.2227	8.28312	5.91805	30.0532	15.0652	15.0556	9.8405	12.9821	13.9971	3.27695	0.270662	4.05027	54.5535	35.0873	19.4383	11.052	11.25	1862.1	7850.25	4.91918	450.024	919.634	1503.39	669.518	4.74196	0.38129	0.724988	9.58058	57.0163	0.606842	131.019	299.774
51	M	66	22	32.8	7.5	75	179	145	113	37	closed-loop	4	26	68	1	1	707.16	18.8796	12.2223	6.65133	29.4836	14.5782	14.9121	9.33591	12.9754	14.0372	2.81813	0.293834	3.84655	53.9022	38.9849	14.9084	12.9035	1.9	1347.7	5684.38	6.76708	414.647	1451.47	1604.04	735.861	6.0325	0.363582	0.608444	13.2003	61.6012	0.838466	138.05	383.446
52	F	37	32	21.7							multi-iniettiva	13	34	52	1	0	1100.89	17.0273	10.5567	6.47754	28.05	14.1256	13.9399	9.13161	12.1394	13.068	2.47121	0.283751	3.51335	58.5569	38.9203	19.5175	12.9264	0	1744.49	7363.27	5.76673	525.065	1398.66	1666.15	735.178	5.11897	0.395531	0.756668	9.30358	65.7843	0.802527	147.734	570.069
53	M	26	21	21.1							closed-loop	5	12	79	2	2	651.52	16.4339	11.0609	5.35475	36.0984	21.7504	14.4044	12.695	14.5892	15.7545	3.58828	0.251539	4.44043	47.3851	34.1089	13.1644	9.30294	7.74	1753.21	7369.94	4.87677	360.761	1325.12	1266.44	602.238	5.44145	0.342229	0.393564	9.35427	68.1208	0.673051	119.29	340.21
54	F	23	14	22.5	8.2	94	178	88	63.4	97	closed-loop	4	15	79	2	0	828.18	16.2005	10.0298	6.14547	30.4805	12.8417	17.6958	8.93904	13.514	14.3344	3.94822	0.307653	4.78002	56.8741	37.126	19.7227	12.7556	0	1579.7	6661.96	5.42508	381.269	1111.39	1588.29	647.079	5.58334	0.443122	0.620371	8.34969	60.0051	0.936887	132.19	256.58
55	M	59	49	29.1	6.3	170	164	72	73.6	76	closed-loop						1055.04	18.091	12.8466	5.23454	42.3731	18.8065	23.6333	10.8602	20.8807	22.2097	3.92591	0.394815	5.32722	38.7425	21.299	17.4312	13.9143	7.12	1618.48	6790.94	6.78414	320.85	1056.21	1857.05	687.756	5.75849	0.494291	0.611685	11.8074	74.7986	0.945331	170.234	469.175
56	F	43	21	21		234	182	72	107.6	60	open-loop						1073.05	14.5764	8.04833	6.52126	35.5027	14.1317	21.4068	9.85847	16.8171	17.8024	3.74734	0.316533	4.5642	53.2365	37.4144	15.8085	13.1889	0	1762.85	7424.13	6.04703	445.495	1152.84	1624.67	660.362	5.64427	0.40843	0.675043	11.6232	65.5076	0.652353	189.545	350.177
57	M	26	17	22.6		104	147	87	82.6	47	closed-loop	4	19	77	0	0	1136	18.7321	13.5475	5.17329	35.3158	20.2218	15.111	12.1425	13.7779	15.0003	3.43703	0.298132	4.65937	48.8273	28.668	20.1537	13.1273	0.38	2113.16	8900.19	5.14869	484.18	1113.33	1605.15	745.821	5.79701	0.397509	0.667247	12.2897	90.2156	0.856537	145.062	360.124
58	M	26	22	22.6	7.9	270	153	92	82.6	52	open-loop	13	40	47	0	0	731.67	19.7158	14.5539	5.14297	42.9866	18.8518	24.149	10.8352	20.7781	22.2936	3.9729	0.439073	5.96289	36.495	25.9478	10.5283	9.81225	5.45	1270.86	5329.61	5.60251	229.734	1481	1707.85	710.417	5.36644	0.542939	0.668838	17.5629	69.9605	1.07014	155.745	383.425
59	F	32	18								multi-iniettiva	16	32	52	0	0	525.11	16.0887	13.0219	3.05058	39.8071	25.3624	14.4813	12.491	14.6057	15.7619	4.8515	0.329287	6.15401	47.0076	15.3114	30.8668	6.26052	0	1229.93	5169.94	5.69951	288.179	1204.49	1307.08	587.383	5.12224	0.390266	0.561008	9.95992	41.8642	0.813054	104.982	194.613
60	M	20	9	28.7			177	84	122.2	38	open-loop	9	20	70	1	0	1144.62	19.7523	14.2402	5.51389	35.8973	17.5526	18.3765	9.96241	15.9008	17.1825	4.55333	0.366177	5.77127	45.1389	31.286	13.8334	9.31806	6.55	2261.2	9510.98	6.13391	304.246	955.639	1631.11	663.705	6.41252	0.451088	0.623563	12.7941	62.1926	1.11445	146.436	372.068
61	F	30	7	22.6	7.1	96	140	46	63.8	67	closed-loop	2	16	79	2	1	980.39	13.9791	9.47736	4.49732	35.2295	16.556	18.7682	10.7019	13.6464	14.872	5.82924	0.283989	6.81573	52.9714	28.204	24.6411	9.7154	2.77	1806.41	7601.01	4.79404	314.17	871.735	1447.04	555.721	4.93244	0.343222	0.453939	11.8578	69.3475	0.830376	114.869	259.321
62	M	70	22	23.8		197	120	88	65.4	37	open-loop						1187.13	12.6156	6.63154	5.97592	30.1077	13.9039	16.1991	9.78545	13.4367	14.2246	3.18394	0.306941	3.86195	54.9765	32.4695	22.4947	11.3817	15.3	1964.55	8272.14	5.22766	349.154	881.963	1471.8	536.291	4.11799	0.351225	0.570105	9.98193	65.2923	0.768624	117.335	194.309
63	F	35	17	27.8		148	173	62	94.6	66	closed-loop	5	20	75	0	0
64	M	22	9	21.4		130	112	60	41	59	closed-loop						1082.16	18.1045	13.0542	5.03714	37.9697	26.2086	11.7833	13.3601	14.3881	15.6955	4.81911	0.336102	5.83236	44.8015	34.2758	10.4356	7.66939	10.07	3641.75	15305.7	4.64612	275.609	1789.51	1074.83	592.962	5.50834	0.447587	0.475046	9.46523	34.9035	0.700213	113.575	561.508
65	M	55	47	26.8	6.8	157	192	65	100	79	closed-loop	16	50	31	2	1	1496.17	18.6577	14.0692	4.58358	33.4324	22.465	11.0077	12.353	13.2121	14.4807	2.72358	0.292465	3.83861	46.4467	28.9638	17.4553	8.94863	14.18	2461.83	10355.8	4.85411	516.409	1307.37	1563.22	725.294	5.49591	0.38183	0.710853	12.6694	60.9547	0.930202	118.4	340.137
66	F	21	18	25.4		157	169	73	86.4	68	multi-iniettiva						567.13	20.0375	16.4088	3.60654	45.0526	26.2074	18.9087	13.8268	16.4924	17.9884	8.59526	0.43067	9.919	37.2764	28.1129	9.14732	5.2033	0	1985.28	8328.3	4.86581	323.828	1507.31	1239.81	665.81	6.97131	0.438225	0.554078	11.414	15.7509	0.91171	96.0419	196.451
67	M	23	4	20.3		102	202	139	108.2	66	multi-iniettiva						1567.33	21.2617	17.6835	3.56907	45.1646	32.5703	12.661	17.1146	16.3403	17.8966	4.32544	0.325626	5.98947	27.2945	18.9632	8.31187	7.09084	40.25	3510.16	14689.1	5.66641	594.118	1236.98	1296.29	825.529	5.91426	0.492855	0.638148	13.3812	30.7479	0.840418	155.326	422.881
68	M	57	34	23.8		96	141	69	70.2	57	closed-loop	1	20	78	1	0	1959.16	16.6685	11.2951	5.36052	41.5264	18.5661	23.0151	11.2308	19.457	20.5642	4.94787	0.464224	6.3319	38.8	25.6633	13.1149	11.2035	22.5	3121.34	13093.9	5.73792	406.71	1005.82	1648.63	679.067	5.30862	0.464544	0.784919	12.5331	65.4591	0.954718	145.969	1084.43
69	F	60	26	25.6		135	190	75	109	66	open-loop						1126.32	16.2995	10.709	5.58218	37.7821	19.1961	18.586	12.6763	13.9244	14.9676	4.42879	0.470356	5.77932	40.8656	22.3121	18.5224	13.0189	20.23	1932.58	8115.07	5.38658	572.463	1109.42	1685.41	772.061	5.25722	0.434652	0.476048	8.94142	74.548	0.890002	152.439	357.279
70	M	28	16	20.2	7.5	163	170	50	115	53	multi-iniettiva	6	22	71	1	0	877.23	15.3703	10.1062	5.27485	34.1833	21.2121	13.052	12.2199	13.2742	14.7648	3.34885	0.274694	4.34664	52.7216	35.3997	17.2824	9.35397	2.96	2227.93	9379.13	4.78022	345.716	990.318	1178.43	581.688	4.71738	0.547594	0.686736	8.99939	51.3391	1.03235	152.451	338
71	F	36	20	22.5	7.5	185	223	64	128.2	82	multi-iniettiva						907.65	15.1418	10.2834	4.89534	43.6345	23.8424	19.8475	16.1179	17.7689	19.1665	4.11758	0.336533	5.0955	43.8487	25.1771	18.5168	9.59889	0.19	2273.18	9540.63	5.21736	566.136	1173.43	1198.71	657.59	5.21736	0.29914	0.457509	4.96661	43.9736	0.607079	130.333	644.172
72	F	25	16	25.8		173	163	32	100.6	56	open-loop						1381.45	16.687	11.6519	5.03076	34.4578	18.305	16.2012	11.0353	14.5588	15.8011	3.52677	0.300082	4.63997	44.2128	31.1167	13.0631	8.15993	28.3	2789.24	11725.4	5.61443	354.53	1103.8	1368.76	655.731	5.3061	0.358521	0.494758	10.6552	47.5542	0.799501	124.371	311.479
73	M	26	9	29.9	9.2	190	185	73	123.4	47	closed-loop	12	23	64	1	0	1962.06	16.6206	11.8134	4.79712	39.3147	22.0037	17.4208	14.288	14.8338	16.3227	4.94784	0.371411	6.14927	44.2535	24.3258	19.8703	9.84688	9.49	2786.67	11709.2	5.63755	692.353	838.668	1601.73	767.601	5.17822	0.355263	0.714114	10.1878	80.3037	0.77153	156.204	569.185
74	M	45	14	26.8	6.8	212	245	225	150	50	open-loop	4	26	69	1	0	1005.28	15.0395	9.17841	5.85093	31.9614	15.1605	16.8055	8.99057	15.0967	16.0399	3.4176	0.378214	4.31529	47.3603	34.5993	12.6699	9.71611	22.5	1975.07	8307.48	5.76182	334.758	1094.48	1505.23	576.774	5.26057	0.405049	0.506311	8.74399	66.0129	0.794909	138.182	288.962
75	F	24	22	19.6		171	211	68	120.4	77	multi-iniettiva						1825.66	13.3856	7.29674	6.07924	30.6036	11.8118	18.8382	8.31717	13.214	13.9723	3.99917	0.414775	5.23731	56.829	27.7301	28.8499	15.1362	11.39	2907.6	12256.8	6.25602	323.428	741.11	1704.02	646.22	4.60173	0.46774	0.629385	10.8887	102.806	1.00426	168.011	390.353
76	M	23	11	29.4	7.6	121	142	63	91.4	38	closed-loop	12	21	65	2	0	663.52	17.4252	12.487	4.92163	41.9312	29.2642	12.7254	14.5737	15.9068	17.6223	5.05087	0.504556	6.53267	43.02	28.3495	14.6374	8.22042	0.81	1694.56	7117.73	5.67109	256.267	1086.55	1279.05	596.946	5.59437	0.489803	0.531111	11.6785	35.9385	0.820272	116.248	359.503
77	M	26	14	24.7	6.7	116	193	73	128.4	50	multi-iniettiva						1401.07	19.5328	15.5745	3.93895	41.9309	19.8417	22.1475	12.2358	20.5374	21.5865	3.94866	0.371553	5.10339	36.2697	20.5512	15.7088	9.05812	15.73	2470.71	10364.1	5.39116	407.676	977.011	1629.51	723.954	5.34259	0.477596	0.716393	13.8826	59.0559	1.07257	128.809	396.744
78	F	25	7	22.4	6	108	177	60	95	70	closed-loop	1	13	83	2	1	567.23	21.3282	14.5317	6.7965	33.9253	15.5609	18.4028	8.52549	15.6301	16.8666	4.11681	0.353309	5.68366	47.7803	41.332	6.43465	10.9065	0	1171.78	4936.47	6.70774	320.913	1252.04	1456.75	757.173	6.48586	0.494973	0.750994	14.7212	17.9556	0.947277	118.077	186.298
79	F	30	23	25.5	6.2	123	147	87	95	40	closed-loop	4	16	79	0	0	1039.06	17.8652	13.3233	4.53069	36.8256	16.4123	20.4939	11.5597	13.9633	15.3793	6.24342	0.211641	7.06479	45.9676	25.5873	20.331	10.1342	5.65	1786.04	7512.52	5.15106	585.155	1255.81	1572.28	787.233	6.0133	0.509507	0.778258	10.5709	43.9016	0.851045	130.77	347.484
80	F	52	47	28.3	8.2	129	222	65	114	95	closed-loop	5	24	69	1	1	914.33	16.0708	10.8787	5.18163	43.1834	16.1716	27.0586	11.5698	18.0375	19.1271	7.76777	0.294624	8.75453	41.611	26.2033	15.2955	12.0915	4.76	1924.49	8073.73	6.13149	364.881	1326.93	1407.01	669.305	4.94157	0.441675	0.488441	11.2601	56.6748	0.753446	148.226	456.999
81	M	26	10	21.2	5.5	107	174	40	106	60	closed-loop	5	16	77	2	0	1048.13	18.8949	11.7665	7.13004	30.0618	16.0897	14.0119	8.70181	13.2047	14.4716	2.92835	0.325775	4.4233	54.5355	42.7867	11.5702	12.2789	0	2486.38	10490.5	6.04091	272.887	656.183	1598.35	719.649	5.45371	0.506761	0.591221	11.3659	102.454	1.08592	175.001	530.643
82	M	28	21	20.8	6.8	161	188	85	117	54	open-loop	0	11	87	2	0	596.04	20.0902	14.5421	5.5274	38.6847	22.4326	16.3104	12.2386	16.4036	17.6618	4.3106	0.355333	5.38242	43.9422	34.4045	9.49884	11.6503	0	1545.03	6493.13	5.84455	338.142	1418.94	1319.92	697.229	6.15522	0.498372	0.576041	14.0062	39.0866	0.919076	128.379	336.809
83	F	21	18	25.3	7	226	149	81	80.8	52	multi-iniettiva	16	21	49	9	5	1543.11	15.6956	9.88145	5.79667	34.5813	13.5486	21.0468	10.2535	16.4472	17.3047	3.56778	0.289583	4.31845	52.4736	32.9969	19.4705	10.465	2	3201.15	13478.5	5.90413	405.62	933.215	1435.58	626.116	5.02632	0.412352	0.677881	11.3334	59.4693	0.902801	145.357	482.78
84	F	42	9	22.9	8	214	206	46	109.8	87	open-loop	10	25	64	1	0	1015.84	15.7577	9.89157	5.84678	39.7464	15.5986	24.1817	11.6409	17.9355	18.937	4.43185	0.401576	5.49627	47.4666	28.2748	19.1445	13.0472	0	1860.17	7818.6	6.36501	391.545	901.74	1531.92	664.713	4.78451	0.462323	0.607471	10.0959	64.8113	0.913895	155.147	358.639
85	F	23	10	20.4	7.5	236	161	34	65	78	open-loop	7	28	60	4	1	966.77	18.0166	13.3738	4.63587	38.7954	18.9687	19.8891	12.1622	15.6305	16.9356	5.20496	0.348384	6.59329	46.0491	25.0328	20.9908	9.23246	0	1730.85	7277.37	5.52908	497.293	1094.1	1672.55	726.579	5.33264	0.410203	0.716411	12.5372	49.0337	1.03995	126.568	452.564
86	F	41	32	29.6	8.6	183	156	73	100	54	open-loop
87	M	48	34	24.3	7	70	141	85	93	43	open-loop						1069.27	14.246	8.03251	6.19764	31.636	18.9723	12.7065	11.4077	11.7609	12.7315	4.42462	0.289028	5.124	57.4852	40.8112	16.6645	8.28229	0.78	2522.25	10637.7	4.12727	420.692	1142.72	1192.46	605.118	4.53167	0.400436	0.646248	9.43602	35.2741	0.618495	105.596	263.614
88	F	59	45	24.3	7.5	162	207	90	117	72	open-loop	12	23	64	1	0	1100.34	17.4785	11.0045	6.47174	42.1547	14.3664	27.7883	10.5836	20.2022	21.1364	5.81019	0.503003	6.86239	41.6317	30.2326	11.3489	12.3298	3.21	1753.47	7364.21	6.48429	442.129	1094.75	1696.8	698.849	5.83415	0.42202	0.826932	14.1263	86.4742	0.872556	160.807	267.116
89	M	48	20	25.1	8.9	91	169	78	98.4	55	open-loop						1005.13	14.5226	8.66742	5.83716	35.8916	16.6022	19.3436	10.3651	16.1822	17.51	4.20023	0.302597	5.09447	51.4666	38.7043	12.7121	9.81558	3.73	1992.75	8388.72	5.16874	190.385	1081.84	1388.91	508.232	5.37448	0.431564	0.627274	13.6896	53.1728	0.767783	144.067	396.728
90	F	18									multi-iniettiva	46	35	19	0	0	1918.2	12.104	7.40063	4.69296	38.0106	17.6945	20.4284	12.3833	16.9484	18.4826	3.46359	0.292335	4.48793	53.0569	26.952	26.0841	9.2352	0	3848.32	16194.8	4.38373	291.914	891.262	1194.09	507.401	3.99395	0.298832	0.423561	7.16936	42.1197	0.60286	128.513	380.849
91	M	47	10	23.9	6.2	177	178	53	96.4	71	multi-iniettiva						1474.99	16.3665	9.66165	6.70175	41.9699	13.2146	28.7832	10.1261	19.4232	20.3256	6.28201	0.4722	7.42229	39.3881	24.0461	15.07	12.5959	17.05	2573.06	10794.7	7.33757	316.273	912.431	1709.1	715.44	5.04069	0.524667	0.579077	11.8264	62.105	0.991038	176.039	463.643
92	M	46	37	24.5	6.4	81	181	58	103.4	66	closed-loop	0	8	90	2	0	649.25	15.0908	8.54544	6.5308	37.3983	12.3786	25.059	8.55419	17.5085	18.44	6.28444	0.354238	7.12411	48.7798	35.9952	12.7555	13.9508	3.21	1371.96	5767.56	5.67072	227.383	1463.54	1443.72	507.945	5.21881	0.415464	0.532085	11.6986	52.8368	0.779906	143.211	688.395
93	F	26	8	23.5	7.5	207	205	61	127.8	65	multi-iniettiva	24	29	45	2	0	1532.37	18.0746	13.0568	5.00692	35.5918	9.78442	25.822	7.70493	18.0632	19.0048	4.31594	0.485543	5.61072	46.6252	15.812	30.7739	14.2611	6.43	1835.06	7723.45	6.40306	514.637	955.941	2121.79	796.77	5.08975	0.544941	1.07353	14.2012	100.629	1.18252	193.994	657.973
94	M	21	11	23.3	6.9	156	185	67	95.6	76	multi-iniettiva						1059.08	15.5079	10.0629	5.46084	39.0911	18.3947	20.7548	11.8784	17.542	18.6475	4.08807	0.32095	5.04119	46.7327	32.1022	14.5642	8.96932	6.44	2776.13	11664.7	4.78004	337.297	1036.94	1247.85	601.726	4.48106	0.313386	0.349407	7.62933	50.7901	0.684406	110.769	394.434
95	F	41	5	28.3	9.6	147	186	87	126	52	closed-loop	28	33	39	0	0	1732.12	14.8625	10.7471	4.13032	37.7565	22.155	15.6647	14.1666	15.226	16.6311	2.99613	0.282514	3.92174	50.4229	24.1029	26.2358	9.8219	0.41	2421.12	10189.3	4.72096	466.466	1181.25	1616.03	640.274	4.7003	0.334556	0.739327	11.0073	56.4532	0.7765	114.319	460.163
96	F	53	32	23.3	6.9	201	256	118	169.4	63	open-loop	7	27	64	2	0	595.39	16.9778	10.891	6.06458	43.2713	23.7986	19.5282	15.4802	18.1548	19.3336	4.88206	0.361428	5.67164	42.4619	34.4821	7.93782	10.3671	0	1618.58	6795.91	5.19591	474.626	989.034	1050.51	690.747	4.84993	0.383052	0.420121	7.66104	37.5082	0.67343	133.673	306.781
97	M	41	31	20.1	8.3	54	120	52	56.6	53	open-loop						1634.87	13.191	8.97986	4.20538	40.8469	21.379	19.558	14.2398	16.6882	18.1263	4.55249	0.305644	5.47907	48.1667	25.3224	22.7414	7.45343	3.21	2797.37	11757.1	4.30762	448.847	982.669	1260.39	608.908	4.30047	0.332455	0.650611	11.4036	53.2035	0.532643	116.667	449.726
98	M	46	33	24.1	6.8	66	147	52	76.6	60	open-loop	7	24	65	4	0	1039.35	18.7436	12.0235	6.7053	38.5201	16.4265	22.1316	9.42933	16.4408	17.3908	6.04237	0.627039	7.56247	44.7879	27.3744	17.3882	15.2273	2.01	1894.62	7962.27	6.6768	312.775	792.745	1693.4	730.426	6.17538	0.591148	0.617538	12.4933	68.8529	1.21396	153.556	346.407
99	M	33	26	24.1	8.2	170	189	82	124.6	48	open-loop	5	23	70	1	1	1572.06	14.2794	9.44088	4.82391	33.5943	17.7366	15.9069	10.8866	13.7328	14.769	4.40055	0.373817	5.46625	55.3074	28.1856	27.0809	11.2145	0.64	2744.66	11562.5	4.90042	345.799	1076.55	1572.65	584.382	4.52515	0.404422	0.575663	8.64224	83.6206	0.776052	124.988	295.778
100	F	20	12	28.2	9.1	166	180	109	94.2	64	open-loop	29	41	28	2	0	590.73	16.935	11.4679	5.45091	35.8413	17.5234	18.3543	10.7239	16.383	17.6447	3.88802	0.309343	4.92523	50.2794	36.8678	13.39	9.16572	0	1483.79	6244.38	4.79852	277.809	1527.48	1373.44	586.512	4.87266	0.566118	0.586336	11.0528	67.4017	1.14571	146.739	291.928
101	M	44	29	25.5	7.3	108	189	42	115.6	65	closed-loop	6	28	65	1	0	1292.73	18.1941	12.3422	5.85186	59.214	16.5569	42.7165	13.1836	29.9609	31.478	7.24655	0.800934	9.25524	21.8517	11.8695	9.86359	11.9081	6.26	2123.77	8857.91	6.3472	470.969	894.358	1793.78	752.483	5.69742	0.447318	0.470861	12.4025	81.3836	1.08298	161.011	639.961
102	F	32	20	20.5	7.1	87	209	79	130.2	63	closed-loop	2	21	76	1	0	900.08	14.3487	7.69912	6.63526	33.2782	15.4121	17.9506	10.2264	15.0138	16.1724	3.28276	0.313794	4.15575	55.7712	38.5492	17.2005	11.6443	0	2237.14	9427.02	4.95275	308.742	1230.25	1409.99	547.623	4.75607	0.429119	0.527459	7.37549	50.4483	0.715199	143.643	383.883
103	F	54	39	26.9	7.9	228	281	166	163.8	84	open-loop	23	36	39	1	1	806.69	20.1099	14.8206	5.26181	31.9177	24.7355	7.24967	12.6883	11.0348	12.1934	2.91899	0.236219	4.0101	45.569	35.5128	10.0487	7.76148	11.25	1600.21	6735.33	5.10558	540.398	1474.26	1454.73	747.308	6.0992	0.3812	0.681161	10.8986	46.6564	0.799895	121.946	552.696
104	M	46	32	35.98	9.5	111	230	126	172	37	open-loop	34	30	34	1	1	1425.48	15.9722	10.7471	5.21439	38.5104	17.4465	21.1159	10.4199	17.5586	18.675	5.32199	0.380142	6.37038	47.5235	24.3789	23.0753	13.2405	2.87	2249.16	9452.21	5.96223	335.499	1232.24	1828.22	627.061	5.16637	0.471287	0.649131	12.4535	79.7987	0.978143	147.882	499.52
105	F	31	10		7.8	139	154	83	99	49	multi-iniettiva	12	19	67	2	0	1205.39	16.5688	9.32243	7.24155	39.6819	14.9845	24.7297	11.1584	18.3072	19.3177	4.84022	0.442308	5.97296	44.7406	33.446	11.0469	13.0575	6.19	2502.78	10510.7	6.2091	398.045	1093.32	1461.44	713.055	5.26614	0.515427	0.603329	11.2275	56.665	0.958934	182.453	341.021
106	M	32	19	20.9	7.6	97	214	81	97	98	multi-iniettiva						1063.92	17.7175	12.3812	5.30006	40.9161	17.1832	23.8605	11.5372	19.5315	20.5831	4.47703	0.387975	5.65116	41.2501	21.2252	19.9841	13.131	6.44	1763	7399.75	6.89733	443.454	736.341	1774.21	708.106	5.173	0.402723	0.663642	13.0913	78.0771	0.901872	181.032	580.868
107	M	23	15	21.3		79	195	74	119.2	61	open-loop	12	36	51	1	0	1060.27	16.7776	10.9661	5.81308	33.1343	17.1209	16.0497	10.7119	14.0925	15.1419	3.34429	0.254181	4.24845	53.0278	31.938	21.0655	11.422	0.99	2478.55	10439.8	5.9672	356.826	1060.05	1424.3	660.66	5.36201	0.407496	0.508362	9.02544	61.9152	0.823062	144.108	341.514
108	M	57	32	29.1	6.7	55	175	87	104.6	53	closed-loop	5	26	65	3	1	1317.84	14.7849	8.62466	6.15674	37.9841	15.0048	23.0068	9.81247	19.4799	20.2911	3.98925	0.407547	4.95718	42.1915	31.6476	10.5231	13.8505	23.49	2296.67	9640.45	6.5312	370.624	910.414	1574.86	661.118	4.82002	0.552975	0.779389	13.9811	68.1639	0.988388	187.162	395.342
109	F	43	33	21.7	7.2	105	167	62	106	51	closed-loop	3	22	73	2	0	758.69	11.1035	4.31636	6.78441	37.3795	11.6138	25.7657	10.2072	17.0629	17.8825	4.99045	0.501492	5.83443	54.9113	30.6168	24.1912	12.646	0.45	1471.61	6191.04	4.93337	299.21	631.132	1581.89	516.781	3.81215	0.394126	0.482465	10.2405	54.2739	0.822229	110.206	276.425
110	M	51	29	21.4							closed-loop	5	17	77	2	0	2062.3	15.5631	10.2659	5.29392	33.2827	15.742	17.6052	9.74043	15.345	16.6054	2.9127	0.260506	3.94232	46.5106	29.8868	16.6029	9.1494	37.35	3627.56	15253.2	5.59605	338.09	989.941	1539.21	650.084	4.5623	0.328044	0.537551	10.842	69.278	0.736032	148.13	487.297
111	M	25	21	26.9	7.1	124	156	62	90.6	53	closed-loop	9	26	62	2	1	842.02	17.3929	12.0754	5.31383	31.6578	16.4195	15.2591	10.5056	13.5682	14.4717	3.36512	0.306674	4.12352	51.1141	33.0471	17.9326	8.96997	9.02	2171.69	9146.23	4.6001	355.608	1526.85	1157.4	608.029	5.22174	0.414424	0.465076	9.66528	39.688	0.764382	107.036	262.722
112	M	33	19	23.9	7.3	123	205	80	123	75	closed-loop	26	24	49	1	0	1408.71	16.0238	11.7523	4.25047	37.3144	19.7269	17.6536	11.958	16.7469	17.7764	3.64124	0.387265	4.63774	42.3851	19.5627	22.793	11.9381	18.26	1905.67	8003.15	5.52562	467.132	875.839	1840.1	698.725	5.237	0.451285	0.829105	13.8534	63.9198	0.90257	135.648	348.397
113	F	22	9	20.6	7.5	101	139	57	66.6	61	closed-loop	6	25	67	1	1	965.44	15.5864	10.5512	5.03666	41.9272	20.1179	21.8618	12.9289	17.0397	18.1838	6.1891	0.304866	7.1332	45.2862	27.7563	17.4134	9.52842	0	2745.47	11530.1	5.3907	234.612	890.875	1276.33	551.946	4.8152	0.440726	0.517216	8.4685	44.2219	0.86324	117.197	280.101
114	F	25	4	23.7	7.8	85	182	70	105	58	multi-iniettiva	8	28	60	4	0	1731.73	13.8638	8.55189	5.32113	40.9412	16.7424	24.2237	11.9933	18.7594	19.7283	4.73246	0.436651	5.68062	46.8995	19.6414	27.1916	16.5142	3.55	2164.2	9087.09	5.77119	438.134	1018.07	1840.41	636.004	4.68995	0.388134	0.609925	11.7272	79.9787	0.896405	137.233	326.379
115	F	33	9	36.7	7.3	157	146	55	88	47	open-loop	13	28	59	0	0	1413.21	15.63	10.1518	5.4718	42.7317	13.5153	29.2742	9.93784	21.6235	22.6105	4.91595	0.45741	6.26411	44.3821	21.0484	23.1112	15.1989	0	1869.22	7848.39	6.29139	383.887	890.414	1819.2	659.559	4.80949	0.390537	0.444035	10.1379	105.349	0.962969	175.875	478.076
116	F	33	25	22.9	9.9	234	179	47	125	48	multi-iniettiva	50	23	25	2	0	963.03	16.5327	12.0049	4.52108	45.8312	26.5898	19.2564	15.3339	20.4954	21.6942	4.66488	0.40128	5.67811	39.5885	23.8583	15.6811	8.34885	1.53	1794.26	7528.17	5.30581	482.801	1235.31	1325.23	694.32	5.38941	0.5016	0.841573	11.0965	51.8487	0.746826	124.765	523.035
117	F	46	35		7.4						closed-loop	0	16	81	2	1	1408.81	16.6633	10.8102	5.83307	36.9273	19.0785	17.9392	11.0538	15.7918	16.9763	3.82023	0.320989	4.87813	49.0837	30.4332	18.5943	11.3929	0.87	1990.72	8374.42	5.57085	480.263	1120.35	1630.25	697.617	4.88266	0.346608	0.72838	12.2368	83.1106	0.71331	169.918	429.086
118	M	39	9		7						closed-loop	9	26	65	0	0	917.7	15.9649	10.9065	5.05841	33.0925	13.5028	19.6389	8.9825	15.7541	16.6581	3.4462	0.340145	4.37265	50.2499	27.5537	22.2307	9.0556	10.62	2010.91	8463.35	5.08228	242.184	1014.24	1479.87	569.916	4.39105	0.36302	0.50226	10.8359	46.8146	0.880199	120.329	365.083
119	M	36	19	22.3	7.8	168	175	49	92.2	73	closed-loop	4	17	78	1	0	1268.49	15.9658	10.0429	5.91799	41.8624	18.3926	23.4992	12.1438	18.61	19.7301	5.01449	0.449499	6.00192	40.5351	25.4749	14.9407	12.8422	13.93	2442.72	10249.8	5.33831	396.759	788.191	1452.72	670.175	4.58505	0.536287	0.573132	11.4217	54.7545	0.982511	144.986	467.16
120	M	54	30								multi-iniettiva						1128.28	15.1668	8.96774	6.19715	34.7418	11.4779	23.2856	8.38265	18.9749	19.7607	3.36869	0.373334	4.48869	53.5363	39.5078	13.8838	12.3576	0	2073.21	8728.68	5.13214	299.839	983.649	1463.46	614.969	4.43274	0.409992	0.670458	11.4074	39.0216	0.766927	117.142	158.334
121	M	32	30	31	8	53	173	64	109.2	51	open-loop	12	32	52	3	1	1784.94	15.3077	9.0075	6.28852	35.5164	13.5411	22.0279	9.56615	17.7398	18.7111	3.31419	0.360639	4.28029	44.0582	31.9223	12.1149	10.6817	36.47	3418.93	14365.3	5.57484	324.195	694.273	1517.52	611.949	5.00741	0.409485	0.555729	10.8045	65.9563	0.816045	168.439	397.048
122	F	56	11	24.8	7.3	165	226	62	116.6	97	open-loop	20	31	47	1	1	906.95	17.4191	10.6253	6.79114	43.7645	14.7341	29.0843	11.4765	20.2054	21.2253	5.43531	0.557929	6.91112	40.2642	26.514	13.6756	14.1449	2.55	1500.19	6296.19	7.08577	379.125	900.473	1750.16	759.524	5.49264	0.493271	0.619921	14.1582	76.0237	0.979876	201.714	390.197
123	F	46	25	26.5	7.3	100	175	46	104.8	61	open-loop	22	39	36	2	1	745.75	18.5977	13.4422	5.15284	45.8958	22.8355	23.1088	13.1183	21.2869	22.9631	3.978	0.449423	5.58135	36.2832	21.0028	15.2345	11.9981	3.09	1481.9	6210.43	6.72785	371.172	1062.38	1664.71	731.75	6.09353	0.593832	0.674809	12.2613	54.9227	1.19441	184.378	712.713
124	F	24	16	25	6.8	248	154	44	78.2	67	open-loop	6	25	66	2	1	1003.14	16.2145	10.2942	5.90925	41.8607	15.6369	26.2686	11.6705	19.0764	20.0357	5.18413	0.646152	6.37702	44.4685	26.6104	17.8029	12.2493	0.75	1810.72	7607.1	5.90925	480.82	1085.76	1670.77	711.303	5.56685	0.491517	0.756605	10.6532	75.8262	1.01065	165.575	381.346
125	M	32	15	23.5	7.6						multi-iniettiva						1447.88	12.1631	6.14719	6.0325	32.0253	11.8545	20.1362	9.18354	14.3154	15.0443	4.03842	0.316582	4.80992	57.5629	31.1025	26.412	13.0062	9.02	3383.01	14254.7	5.48328	369.978	840.086	1245.96	573.285	4.23883	0.316286	0.520247	8.31508	38.7761	0.558674	125.06	407.693
126	F	35	13	25.6	7.4	88	232	99	136.2	76	open-loop	12	28	54	5	1	1016.37	15.6346	9.43527	6.1753	39.2443	14.7735	24.5249	10.5087	16.8924	17.7355	6.58655	0.428284	7.56935	48.0419	32.227	15.7729	10.1736	0	1996.34	8393.37	5.12438	331.937	804.096	1477.09	601.536	4.29787	0.485889	0.666219	13.5698	63.0504	0.966769	144.89	254.516
127	M	25	24	19.9	8.3	170	161	79	95.2	50	open-loop	36	30	31	3	0	1051.5	15.0517	9.65698	5.38047	38.0465	18.4485	19.6623	11.1816	15.422	16.5353	5.61493	0.418005	6.75238	45.5071	28.1867	17.3007	9.82936	13.17	2239.21	9408.04	5.3367	328.035	1155.93	1412.84	599.921	5.02856	0.424257	0.634152	9.98566	70.5651	0.817253	132.306	759.701
128	F	30	19	23.2	6.1	104	239	62	147.6	79	open-loop	5	18	74	2	1	1028.05	15.8757	10.5666	5.29972	42.0258	20.1627	21.9054	13.6935	18.8371	20.0729	3.97655	0.337981	5.00106	43.9821	28.6415	15.3077	11.8117	2.01	1704.24	7157.45	5.42177	533.675	1039.64	1538.82	685.121	4.94062	0.375534	0.674788	11.4949	63.0193	0.704126	154.121	535.171
129	M	46	38	30.3	6.4	106	153	126	85.8	42	closed-loop	32	29	38	1	1	1138.92	15.5175	9.62891	5.88678	36.315	13.741	22.607	9.25433	17.7237	18.7772	4.45778	0.375957	5.45758	47.7791	32.6178	15.0199	10.5626	10.57	2178.44	9161.59	5.82068	296.625	758.015	1495.45	613.93	5.0403	0.41314	0.633481	10.9757	94.889	0.849232	156.548	306.761
130	M	58	32	27.5	8.1	295	199	70	118	67	open-loop	16	27	57	0	0
131	F	33	23	27	5.6	56	169	39	97.2	64	closed-loop						821.19	15.3082	10.2146	5.10732	39.7929	16.4633	23.4163	11.1386	18.0731	19.4352	4.48886	0.408641	5.82003	43.7067	24.4964	19.1552	10.4568	8.09	1453.6	6103.66	5.45542	374.56	874.718	1503.88	666.201	4.623	0.364612	0.51596	9.76197	66.0017	0.818657	150.131	345.927
132	M	37	25	22.3	7.4	142	183	47	123	55	closed-loop	8	38	52	2	0	971.3	17.4644	11.8603	5.59334	30.9081	20.5699	10.3721	11.2147	11.1178	12.3962	3.50095	0.338958	4.70667	53.7016	34.8685	18.8095	8.8129	3.28	1858.64	7837.04	5.7569	367.86	1094.59	1310.54	652.854	6.03129	0.398141	0.677915	10.7552	37.7803	0.817802	114.944	241.79
133	M	68	49	24.2	6.6	179	172	92	105.6	48	closed-loop	3	19	78	0	0	1013.63	15.5588	10.0849	5.46915	23.0677	12.4276	10.7515	7.47352	9.2398	10.4704	2.13757	0.180341	3.00744	58.1286	37.4189	20.6955	9.34117	15.49	1696.79	7162.29	5.48094	364.235	1051.71	1321.6	619.417	4.89159	0.265207	0.459692	9.53565	42.6924	0.665963	117.221	552.567
134	F	52	16	21.1	8.4	79	179	91	103.8	57	open-loop
135	M	30	23	26.3	7.2	226	174	91	93.8	62	open-loop	5	22	70	2	1	1207.53	14.9785	8.30154	6.67025	35.7807	11.6192	24.1878	8.79693	17.7702	18.6222	4.20706	0.39406	5.2016	49.1754	35.7999	13.3288	12.6141	10.83	2398.11	10087.5	5.67947	275.271	1027.14	1478.82	614.467	4.77042	0.433675	0.604643	12.4014	56.3736	0.904879	159.484	309.294
136	M	50	32	29.2	7.4	87	205	60	127	66	closed-loop	3	20	75	2	0	1107.22	13.5234	7.63787	5.87181	38.4236	14.7144	23.749	11.5364	17.6272	18.6085	4.07088	0.366865	4.99467	50.8936	28.2786	22.5914	15.6323	0.93	2036.17	8566.96	6.46803	399.844	913.72	1588.5	624.123	4.52811	0.407628	0.672832	11.2662	66.8706	0.692477	141.702	396.489
137	M	44	27	26.5	7.2	144	230	127	126.6	78	open-loop						1130.03	14.9305	9.74345	5.18339	45.5335	18.2076	27.3838	11.9812	19.4818	20.6402	7.85645	0.504732	9.07277	36.2635	22.3958	13.8181	10.2463	17.34	2175.41	9107.79	5.59894	296.078	766.711	1375.11	635.885	5.01974	0.436699	0.468877	11.9472	45.7845	0.855011	137.712	340.556
138	F	37	24	24	7.6	243	162	37	87.6	67	open-loop	26	27	44	3	0	1446.96	15.4593	10.0184	5.4393	41.7853	16.9791	24.8617	10.995	14.0814	15.4285	10.7803	0.451493	12.1496	45.1263	24.8247	20.2588	13.4173	0.99	2431.93	10207.8	7.13836	301.098	1057.47	1649.53	595.346	4.65063	0.39886	0.493435	10.2758	95.7223	0.916967	166.789	526.763
139	M	22	12	31.3	7.2	229	181	73	116.4	50	multi-iniettiva	13	27	57	3	0	1146.2	14.7689	8.83336	5.91907	34.0167	13.628	20.4581	10.1573	16.0851	16.9181	3.73438	0.319297	4.47941	54.6023	31.8803	22.6973	14.9982	0	1944.9	8192.32	5.68153	346.522	956.301	1569.97	633.369	4.60178	0.442182	0.668415	9.40408	97.3006	0.987197	151.103	280.318
140	M	35	32	27.8	5.6	71	146	50	78	58	closed-loop	2	10	85	2	0	585.09	16.7488	11.4952	5.23933	43.1049	19.5407	23.609	12.3203	20.1045	21.3859	4.55523	0.333153	5.79174	38.4293	26.7348	11.6888	12.3722	8.11	1404.76	5888.3	5.25357	309.804	1151.41	1372.09	636.066	4.8834	0.441357	0.427119	10.0231	49.7309	0.840001	128.1	303.425
141	M	38	34		8.1						open-loop	32	35	32	0	0	2024.54	13.3087	8.30449	4.98812	31.1992	15.018	16.2284	8.79152	12.5474	13.5024	5.1883	0.288702	6.15712	53.8898	32.2359	21.5996	7.94855	21.86	3242.1	13655.6	4.47549	300.531	941.667	1252.71	553.04	4.24108	0.308442	0.447241	9.41674	44.7642	0.626137	112.93	350.686
142	M	44	41								open-loop						1673.78	14.6129	10.6798	3.9282	32.2014	16.2443	15.9571	10.3778	13.9942	14.9922	2.85776	0.279884	4.05095	40.2084	20.5215	19.5984	9.37857	52.36	2443.87	10264.4	6.29739	286.533	982.033	1668.77	665.105	4.52152	0.310982	0.531943	11.7273	70.8753	0.769272	123.071	549.497
143	F	24		30.8	7.1	67	205	127	112.6	67	open-loop	12	28	57	3	0	1157.88	14.9841	10.3513	4.64319	45.3149	17.476	27.8716	13.0121	21.2132	22.3948	5.8613	0.346989	6.99136	40.8071	18.5519	22.1177	10.7796	4.06	1919.37	8047.73	5.1371	412.906	766.293	1709.68	633.354	4.61089	0.416803	0.578315	10.3576	85.179	0.932598	133.44	360.441
144	F	42	20	25.48	8.4	184	181	67	121.6	46	closed-loop	40	37	24	0	0	941.53	20.44	15.5221	4.89707	42.9352	20.9611	22.0264	13.9479	19.5041	20.7	3.28463	0.407315	4.52225	39.0582	20.6071	18.4418	11.4014	0	1723.48	7232.92	6.93945	472.149	1326.63	1896.84	752.663	6.0343	0.487386	0.673057	10.1133	84.2017	1.11983	186.611	530.525
145	F	32	27	22.1	7.5	175	142	43	78.4	55	closed-loop	3	19	77	1	0	886.16	14.9111	7.73912	7.16763	30.355	12.8046	17.575	8.16665	13.1236	13.8303	4.47104	0.382812	5.41335	53.718	39.7164	13.8772	10.5028	11.47	1833.8	7722.88	5.81852	204.379	1273.63	1351.76	523.209	4.80423	0.41444	0.545316	13.0876	35.9036	0.817974	136.056	177.059
146	F	35	27	35	7	180	160	81	96.8	47	closed-loop	10	17	72	1	0	866.17	13.6773	6.56611	7.10493	29.4699	9.39571	20.0813	7.76044	15.4856	16.0989	2.85466	0.345379	3.44674	60.5141	38.5508	21.9006	16.7364	0	1276.86	5386.47	5.64666	339.152	696.834	1629.29	599.995	4.37793	0.469903	0.6422	8.45825	116.841	0.986796	193.804	361.778
147	F	26	24	22.8	8.1	158	217	69	145.2	58	closed-loop	3	24	73	0	0	1949.37	17.509	12.9638	4.54119	39.9343	15.5663	24.4137	10.5374	18.9509	20.0699	4.64523	0.461325	6.0018	42.1273	19.3604	22.6085	9.93702	7.52	1970.41	8274	5.51662	422.948	1111.9	1869.96	716.693	5.19689	0.411082	0.537959	12.5659	125.593	0.964266	187.489	539.735
148	F	38	23	23.9	7.7	145	171	54	106.2	54	open-loop						905.7	18.1793	14.4622	3.71482	45.9349	25.1777	20.8034	15.1918	19.407	20.9831	4.29212	0.297779	5.6732	36.8629	19.1856	17.5929	7.40453	3.71	1752.98	7348.17	5.7445	372.104	1262.35	1536.45	687.663	5.03143	0.33657	0.507707	12.7155	61.5067	0.718776	138.108	368.093
149	M	61	22	28.1	6.8	128	156	131	92.8	37	closed-loop	1	8	89	2	0	983.3	18.0775	12.6069	5.45151	35.3254	19.7277	15.6646	11.1617	14.3023	15.3539	5.26296	0.320271	6.13773	44.3621	34.8187	9.52846	7.13307	13.37	1882.78	7921.13	5.53968	509.035	1180.63	1326.64	786.263	4.87577	0.45146	0.717025	11.892	25.9988	0.658601	105.116	218.56
150	F	50	23	25.8	7.7	100	205	46	110.8	85	closed-loop						2004.9	18.4956	13.9373	4.53949	39.9268	19.7946	20.1322	11.058	17.8531	19.2037	4.38942	0.379854	6.24648	42.3185	21.8158	20.2401	8.48809	6.1	2132.4	8959.2	6.61227	293.191	942.272	1538.31	696.727	5.29919	0.42206	0.562746	12.9432	39.955	1.0786	144.813	257.785
151	M	48	45	25.59	6.4	115	208	69	141.2	53	open-loop	11	21	51	8	9	1153.82	17.1257	12.3244	4.77808	37.821	17.3194	20.5383	12.3418	18.3819	19.3502	2.67458	0.277403	3.75803	45.3452	26.954	18.2516	11.4334	5.85	1719.52	7225.09	5.51317	539.255	1107.02	1507.5	708.57	4.8153	0.331488	0.55248	12.0208	52.4042	0.692054	128.885	455.912
152	M	62	23	20.7	9.8	120	165	70	100	51	multi-iniettiva						892.35	17.9689	11.8403	6.11651	32.3549	19.0776	13.309	9.82881	14.0068	15.1261	3.66145	0.344394	4.66744	51.1052	40.0665	11.0266	10.4275	4.82	1986.1	8370.98	5.93122	336.927	1170.86	1404.16	711.223	6.31892	0.468254	0.649514	11.505	39.3434	0.860984	116.258	207.875
153	F	29	28	27.1	6.6	87	173	59	89.2	72	closed-loop	4	20	74	1	1	751.68	14.3007	7.82632	6.46212	43.2156	15.6569	27.5974	11.8741	20.9773	21.9839	4.38018	0.370546	5.30378	44.7408	28.5351	16.1	14.0353	1.19	1627.33	6829.8	6.7411	254.337	959.16	1489.5	613.201	5.10652	0.399427	0.657519	11.6756	59.3057	0.798855	182.409	290.205
154	F	33	26	20.9	6.2	147	194	46	109.8	75	closed-loop	8	20	72	0	0	1048.28	12.7408	7.96944	4.77335	35.9337	18.3988	17.6151	11.0384	14.5917	15.9898	3.44198	0.298335	4.5997	48.5192	25.4737	22.9901	10.6619	16.63	2021.22	8492.35	4.77929	291.428	876.025	1392.27	545.977	4.3736	0.346325	0.455171	8.38108	66.6479	0.791601	136.7	272.598
155	M	22	9	23.9	8.6	285	232	100	157	55	multi-iniettiva						1289.09	15.0691	10.3503	4.72509	34.2544	20.3297	14.0155	11.0059	11.6299	13.1957	6.0504	0.260964	7.07723	53.838	35.5983	18.1994	5.92527	0	3172.85	13362.6	4.36831	227.417	1236.72	1034.91	514.998	4.8978	0.34354	0.334084	7.42235	29.6169	0.617741	95.5324	251.052
156	M	37	19	31	6.7	110	144	84	86.2	41	closed-loop	12	26	61	1	0	548.91	17.1857	13.0208	4.14101	39.5931	23.035	16.6334	12.3621	16.5581	17.9352	5.31494	0.441118	6.28325	45.5129	30.4073	15.0961	7.99751	0.5	836.51	3517.4	4.12428	301.873	1680.91	1804.59	647.56	5.61858	0.657494	0.932446	14.7996	94.3802	1.14763	159.125	319.255
158	F	76	50	22.3	6.3	120	195	83	106.4	72	open-loop	1	10	84	4	1	886.88	19.0909	13.6105	5.73745	47.416	14.1406	33.3327	12.4625	23.3329	24.3466	5.26336	0.566999	6.51763	34.6385	18.816	15.7894	10.8182	1.61	1571.43	6578.42	6.61181	391.611	940.271	1789.78	759.671	5.7209	0.426363	0.636363	10.5636	80.2581	1.11364	144.206	449.82
159	F	54	22	36	10.1	156	216	55	127	78	open-loop						600.65	18.6525	12.3443	6.29276	35.602	15.1397	20.504	10.3112	17.2618	18.2428	3.33965	0.292219	4.45982	47.9981	37.3546	10.6188	11.5342	1.25	1293.55	5442.31	5.26458	390.29	1230.98	1516.19	688.369	5.58927	0.47157	0.626184	13.9307	49.7004	0.81172	144.656	432.538
160	F	39	23	22.59	8.7	195	225	49	125.2	90	open-loop	32	38	30	0	0	951.49	14.0099	7.58157	6.43743	29.4375	18.3486	11.1241	11.2297	11.0948	12.0008	2.89098	0.240426	3.57707	60.2212	43.351	16.8311	9.01109	0.38	3069.55	12946.5	5.17665	268.209	1403.97	1091.92	497.216	4.14719	0.26714	0.469124	9.32058	37.126	0.524507	112.583	242.876
161	F	36	32	25.5	8.5	145	166	64	95.2	58	closed-loop	9	30	61	0	0	998.89	17.0384	12.3651	4.64787	44.7397	17.6565	27.1659	12.5518	21.7047	22.8695	4.41095	0.483741	5.67123	39.2283	19.8815	19.2987	11.5419	2.87	1413.98	5931.15	5.95482	565.362	1099.66	1829.85	790.421	4.90106	0.53749	0.997185	12.8644	76.6277	1.06791	185.597	433.174
162	M	61	15	29.7	7.6	234	181	67	109.6	58	closed-loop	8	17	69	5	1	914.79	18.6784	13.825	4.84402	33.9519	17.0993	16.8421	10.0958	15.6976	16.8316	3.33901	0.351751	4.35751	34.1158	26.1824	7.91703	7.87503	36.06	1714.28	7188.62	5.68169	262.594	1934.49	1496.65	581.859	6.06669	0.554169	0.595002	14.1634	54.1102	0.816669	141.815	238.602
163	M	51	42	23.7	6.7	79	168	42	93.6	66	closed-loop	1	8	89	2	0	1133.65	17.7335	11.4345	6.2933	40.4955	14.4892	26.0316	9.5835	19.4499	20.4546	5.02395	0.489729	6.32426	44.0062	29.6596	14.3185	12.4449	1.74	2131.79	8959.55	6.57663	289.208	715.549	1682.99	682.056	5.99965	0.581671	0.68487	14.0211	61.9057	1.16803	158.332	371.383
164	M	32	22	33.2	7.8	121	172	148	116.4	26	closed-loop						1222.17	15.2482	10.774	4.46908	31.1627	18.1716	13.0179	9.42936	13.1858	14.228	3.71448	0.301587	4.6536	56.8307	26.4853	30.1689	7.79205	0.41	2357.53	9938.3	4.8992	251.763	958.999	1163.84	529.758	4.60227	0.34358	0.483557	11.7793	40.1734	0.755028	97.2671	292.62
165	F	61	50	40	7.8	153	246	124	168.2	53	closed-loop						1562.27	16.5693	8.91918	7.64315	37.8448	15.8492	22.0271	10.2778	17.7115	18.6483	4.74914	0.411113	5.83645	48.5977	38.1768	10.3789	14.8145	0	4006.2	16844.4	6.79946	386.611	1496.27	1494.61	675.745	5.50147	0.436823	0.37442	9.58265	44.491	0.798762	140.25	618.394
166	M	24	3	30.3	6.2	104	136	61	87.8	36	multi-iniettiva	0	12	88	0	0	654.46	15.3732	10.3468	5.0082	41.0874	21.29	19.8325	13.8207	18.0354	19.2881	4.56006	0.3922	5.46739	46.4682	33.7227	12.7013	9.00825	0	1537.48	6459.74	4.11713	239.242	1735.82	1343.03	489.925	5.22934	0.409761	0.585373	11.7725	40.5664	0.76749	116.58	312.804
167	M	21	8	23.3	6.4	252	136	416		25	open-loop	30	25	41	2	1	1413.28	13.8234	8.84003	4.95779	35.0093	17.5997	17.4528	10.9563	13.3446	14.4278	6.04423	0.270809	6.89123	49.1029	30.1245	18.8952	8.57243	22.27	3123.97	13133.5	4.5615	357.929	1019.27	1179.94	548.968	4.46867	0.361719	0.457751	8.71647	51.0056	0.713835	128.244	229.64
168	F	39	30	41.5	7.4	241	137	47	85.6	42	closed-loop						1092.29	15.9784	11.4246	4.5478	42.2651	23.189	19.0851	14.4987	15.076	16.1899	7.09379	0.31568	8.11298	39.7797	23.3082	16.4394	10.9135	12.06	1995.69	8369.04	5.48682	578.447	1316.43	1521.36	723.574	5.00078	0.400864	0.561209	9.92639	64.7796	0.726566	131.739	502.663
169	M	40	26	24.9	7.5	95	174	223	101.4	28	multi-iniettiva						1225.38	16.0793	10.6357	5.43284	38.0473	18.6406	19.4628	11.3937	18.0431	19.3385	3.26452	0.34891	4.38745	47.5071	31.1337	16.3003	9.57609	4.24	2244.13	9435.89	5.02645	415.341	1232.65	1532.15	625.392	4.96406	0.378766	0.574833	11.5368	52.4167	0.726339	142.915	686.917
170	M	49	36	29.7	6.8	143	140	57	96.6	32	closed-loop	15	26	58	0	0	791.8	17.8955	14.7383	3.14552	46.1953	28.2728	17.9645	15.6387	19.5221	21.1902	4.41483	0.394651	5.55669	37.5007	19.8062	17.5611	6.36704	2.12	1710.37	7168.38	4.58965	428.176	1420.1	1396.64	664.447	5.74729	0.438502	0.625596	9.17345	35.4426	0.877003	101.463	479.545
171	M	43	16	31.5	8.5	155	114	63	62.4	39	closed-loop	28	27	44	1	0	1104.09	20.5162	16.3286	4.16056	38.8612	19.8629	19.0357	12.1421	17.6149	18.9516	3.12198	0.345848	4.29039	41.1279	29.0097	12.0995	9.90809	5.74	1925.7	8092.21	5.30716	455.014	1517.65	1593.5	749.852	6.86504	0.456977	0.804902	15.1893	44.119	1.05416	130.939	331.9
172	M	42	17	24.4	5.9	120	127	46	53	55	closed-loop	10	29	59	1	0
173	F	21	16	26.4	7.4	68	176	56	110.8	54	open-loop	18	26	52	3	1	848.19	17.7131	11.8871	5.80888	35.0104	17.4763	17.5774	10.126	16.0524	17.1637	3.70885	0.365594	4.7912	50.2616	34.4599	15.7911	10.6364	0.38	1870.93	7877.26	6.1253	323.219	988.476	1477.43	666.396	5.70839	0.523804	0.732256	12.1437	55.7744	1.10106	148.84	307.12
174	M	27	24	18.5	7	76	195	112	119.6	53	closed-loop	2	16	82	0	0	802.16	21.5971	16.7423	4.8468	41.7356	22.6033	19.1383	12.2865	18.9582	20.4835	3.54302	0.432369	5.33856	35.3769	19.3445	16.0083	10.4022	7.39	1498.72	6286.83	6.74576	305.808	1124.93	1721.33	729.516	6.06518	0.453721	0.573823	13.7718	61.5992	1.09427	152.597	363.137
175	M	50	20	26.6	6.7	169	162	232	70.6	45	open-loop						1019.76	16.8438	10.9665	5.87188	34.1116	17.9975	16.1957	10.024	14.4591	15.8451	4.05198	0.326115	5.44204	48.1744	35.6389	12.5246	10.712	11.75	2207.81	9287.63	6.11013	248.3	1266.83	1373.95	607.906	5.15443	0.407644	0.561643	11.4865	66.4731	0.901346	163.696	574.597
176	F	55	41	18.4	7.9	135	201	58	92.4	97	closed-loop	1	17	80	2	0	1096.73	13.3152	7.60735	5.70789	48.404	10.422	37.9713	10.7541	25.4713	26.3657	5.26992	0.61054	6.68916	40.9954	18.7494	22.158	13.7342	0	1680.48	7043.33	6.20656	349.626	684.977	1690.62	618.502	4.61773	0.327287	0.458202	10.8421	68.7482	0.678378	168.779	540.262
177	F	32	30	24.6	7.9	116	167	65	99	55	open-loop	8	24	64	3	1	1695.85	19.3877	15.4083	3.97801	41.4844	27.9604	13.5548	14.7773	16.2117	17.5785	4.72098	0.331728	5.69774	40.3466	23.6059	16.712	8.04065	5.76	2930.11	12303.2	4.99981	550.611	1377.76	1541.79	753.06	6.00319	0.447082	0.675743	11.3306	65.332	0.846385	124.623	346.837
178	M	45	35	24.6	7.5	144	142	54	82.2	49	multi-iniettiva						755.05	17.4643	12.1353	5.32688	36.0885	22.0708	14.0601	11.6319	14.0271	15.1162	5.1299	0.273469	6.12004	47.3342	36.0392	11.2426	8.6127	5.34	1908.81	8026.66	4.88262	338.137	1263.65	1296.97	623.755	5.5532	0.361482	0.387676	10.001	45.9082	0.681053	124.8	284.717
179	F	30	16	30.8	7.9	114	176	44	113.2	54	closed-loop						1003.3	14.5872	7.59821	6.9827	35.095	8.85678	26.2522	7.65436	17.227	17.9475	4.93135	0.458513	5.98874	51.2661	34.6806	16.521	15.5697	6.26	1923.61	8093.48	6.44621	322.321	1345.3	1603.85	684.837	4.72029	0.473069	0.629026	12.1646	42.0771	0.914946	152.942	432.421
180	F	31	13	22.6	6.7	188	155	79	91.2	48	open-loop	0	9	66	12	13	3108.17	20.2052	16.0874	4.1081	36.1529	27.2842	8.89612	13.9222	13.72	14.8979	3.59944	0.371696	4.55875	46.6005	21.4479	25.1077	6.51076	0.5	3293.01	13883	5.46916	862.342	1252.17	1998.11	971.603	6.47736	0.549649	1.56696	14.9681	43.7806	0.835102	113.905	635.431
181	F	35	23	20.6	6.7	157	158	52	91.6	56	multi-iniettiva	0	14	85	1	0	969.34	15.8017	9.62474	6.17195	33.2835	11.6447	21.6613	8.82226	14.7826	15.5995	4.58014	0.490126	5.6787	53.3041	29.8707	23.3157	12.8885	2.01	1597.55	6731.08	5.29561	489.737	875.973	1559.36	653.976	5.21423	0.532065	0.763669	12.3752	54.8402	1.12673	145.128	462.709
182	M	34	12	30.1	8.7	193	99	91	55.8	25	closed-loop						1343.28	14.2895	7.69106	6.58988	28.3384	15.6439	12.7441	9.20149	11.0142	11.875	4.35381	0.234521	5.07945	60.7228	44.6344	16.0713	10.6531	1.94	3261.97	13770.8	5.58558	302.74	1414.95	1193.47	583.758	4.88662	0.352548	0.597798	12.1	36.245	0.613126	121.966	327.508
183	F	46	20	33.2	7.6	84	162	55	93	58	closed-loop	9	35	65	0	0	764.76	24.4572	21.1357	3.31723	44.2793	15.2124	29.1238	9.04957	23.2554	24.3474	4.81441	0.474794	6.40972	33.3495	7.39834	25.2464	10.15	0	947.78	3974.2	6.39389	367.849	931.092	2141.28	841.081	6.45719	0.5381	0.928486	23.286	56.8064	1.51934	138.26	303.362
184	M	65	30	24.7	7.2	105	117	66	60.8	43	closed-loop	3	14	81	2	0	862.4	12.9314	7.76385	5.15183	24.4406	11.4786	12.962	7.49464	11.7046	12.3616	2.28159	0.247231	2.83963	59.188	32.848	26.2364	8.77475	12.24	1274.11	5380.12	4.2304	389.425	947.815	1584.88	581.7	4.2304	0.400279	0.902591	14.1511	51.8872	0.580798	110.877	285.438
185	M	38	20	27.9	7.9	122	196	114	122	51	multi-iniettiva						784.48	15.5555	10.3656	5.18179	40.0534	21.4418	18.6891	13.4759	17.1142	18.4974	3.65657	0.37433	4.82521	46.6341	33.2799	13.3379	9.54086	1.74	1971.52	8285.44	4.90992	474.598	1200.03	1232.47	656.402	5.14324	0.355056	0.639101	10.8444	35.0592	0.694895	128.657	389.41
186	F	56	52	21.9	8.2	112	193	74	97	77	open-loop	9	29	59	1	2	702.7	19.7539	14.1603	5.59358	45.9224	21.2461	24.7957	12.6453	21.1864	22.8673	5.11955	0.546085	6.68101	31.7336	15.7682	15.6696	8.7696	6.66	1054.78	4414.99	6.78815	309.79	1188.89	1745.65	717.097	5.62203	0.407668	0.910142	14.676	58.0026	0.948065	189.708	450.065
187	F	43	25	32.6	8.1	191	178	58	97.4	69	closed-loop	5	17	75	2	1	762.74	18.8217	14.2491	4.55875	36.5485	14.621	21.9741	10.4435	17.0979	18.216	4.488	0.302824	5.55953	47.275	25.627	21.5652	12.0698	0.45	1159.09	4874.13	5.61647	455.935	1464.36	1783.33	691.327	5.34902	0.465883	0.672942	9.35216	78.6479	1.05255	146.71	732.48
188	F	21	16	22.6	7.5	154	153	50	84	59	closed-loop	2	14	83	1	0	1084.25	16.9193	12.1288	4.76612	42.4559	18.8078	23.671	12.0276	20.5508	21.6031	4.34166	0.329399	5.26581	43.0292	27.5089	15.5143	10.5174	0.75	1967.22	8261.2	5.29173	322.394	1136.35	1572.89	629.126	5.2714	0.493082	0.655748	11.0257	71.2528	1.04716	149.673	350.8
189	M	30	30	26.6	7.1	94	139	47	76.6	53	open-loop	7	24	65	3	1	1420.15	16.3141	12.9919	3.30988	36.7672	23.5906	13.223	12.7355	15.1405	16.3988	3.75147	0.329647	4.90291	37.5766	17.8886	19.6488	8.88343	32.34	1938.44	8130.79	5.06593	461.319	1200.77	1524.15	706.083	5.1072	0.421473	0.701595	11.7156	49.7926	0.727389	123.476	476.842
190	F	31	18	30.36	9.5	310	154	45	104	41	multi-iniettiva						888.745	19.5812	14.8743	4.68406	32.2423	17.2789	15.0089	9.66179	12.7233	13.5851	5.06868	0.293987	6.11377	51.1096	31.0555	20.0329	10.5585	0.495	1561.3	6578.73	6.27492	444.067	1294.02	1578.67	743.182	6.95961	0.459875	0.979315	11.4315	54.3824	1.07603	174.831	1761.8
191	M	25	25	22.7	7.9	70	140	72	68.6	57	multi-iniettiva	20	28	48	4	0	1325.47	15.5347	10.6287	4.89498	31.7612	17.7199	14.0569	10.5613	12.7305	13.6695	4.11542	0.300599	5.02651	55.6959	39.2838	16.4066	6.89691	1.74	2904.2	12244.7	3.6671	427.595	845.555	994.539	631.565	5.18559	0.447628	0.612905	10.9669	29.0373	0.926245	112.781	216.879
192	F	33	15	20	8.7	175	131	77	62.6	53	multi-iniettiva	19	44	36	1	0	1091.53	21.7974	15.9662	5.82825	36.002	18.9584	17.0586	10.1417	14.9234	16.0968	4.38636	0.421666	6.355	43.0538	25.2434	17.7924	10.224	4.204	1739.53	7314.77	8.35572	298.949	1108.11	1845.61	788.038	6.88635	0.515083	0.996248	17.5985	66.4497	1.24344	183.946	359.826
193	M	27	18	31.1	6.9	103	145	87	88.6	39	closed-loop	5	15	77	2	1	660.77	16.7889	11.2063	5.56978	28.0302	17.5761	10.4599	8.67233	11.036	11.8682	4.26549	0.246199	4.98347	58.427	39.8039	18.6017	8.8722	0.495	1528.03	6448.28	4.95801	158.262	1287.98	1260.47	553.2	5.24465	0.610589	0.63873	13.8878	28.1859	0.952205	94.3789	183.091
194	M	44	37	29.4	5	129	222	84	148.2	57	closed-loop	0	2	76	14	8
195	F	21	15	30	7.2	90	181	46	110.8	61	closed-loop	14	23	63	0	0	674.477	17.6151	12.6009	4.99563	33.0042	23.2942	9.78705	12.2749	11.5398	13.0295	4.0546	0.218776	5.20382	52.198	33.9424	18.1867	6.99413	1.185	2114.49	8907.37	4.04495	404.833	1427.8	1016.4	620.563	5.21261	0.352331	0.407191	10.4877	24.4362	0.606294	94.4683	284.625
196	M	66	32	24.9	6	64	187	74	103.2	69	closed-loop	3	28	68	1	0
197	M	36	23	27.7	6.2	105	202	79	132.2	54	closed-loop	3	13	75	6	3	665.81	15.5569	9.00221	6.53111	29.9024	14.9483	15.0013	8.2987	13.1224	14.3946	2.91544	0.27682	4.35255	58.0942	39.4092	18.651	11.701	0	1528.07	6445.45	5.33353	182.518	975.858	1398.68	558.227	5.01286	0.484271	0.399196	9.2535	51.9479	1.00126	137.775	262.05
198	F	57	2	21.3	8	389	202	58	105.4	85	multi-iniettiva						579.19	19.5349	12.5507	6.97711	39.9617	16.484	23.5424	11.2924	16.796	17.9473	5.65425	0.468049	6.96694	43.2303	34.1276	9.0382	11.0467	0	1672.9	7028.51	5.43368	493.873	1401.52	1395.49	743.278	5.85809	0.424413	0.442346	11.3217	38.3167	0.872736	124.765	237.569
199	M	39	29	25.4	9.2	298	138	66	81.8	43	open-loop						918.838	12.5534	7.79545	4.74891	39.553	25.5853	14.0592	14.0253	14.8749	16.3796	4.85996	0.297499	5.92059	50.951	31.1336	19.7447	7.88614	0	2205.39	9269.68	4.59828	266.124	1307.7	1206.46	487.834	3.9272	0.334635	0.455702	9.05464	40.6844	0.544575	96.7081	297.488
200	F	23	12	24.4	8.8	180	155	35	75	73	open-loop						742.46	15.2285	9.96502	5.23453	28.9326	16.0012	12.9965	9.37914	12.1427	13.003	3.44141	0.247677	4.25614	57.3336	32.256	25.0458	8.73388	3.55	1380.83	5824.52	4.36694	407.291	1255.88	1476.05	602.703	4.23658	0.391069	0.550394	8.87872	94.2839	0.811106	119.24	246.229
201	F	39	18	19.5	7.9	180	173	52	91.6	71	closed-loop	16	29	54	1	0	658.64	15.4195	10.4804	4.91661	32.1511	14.1558	18.0026	9.21502	14.7281	15.4381	4.48435	0.304269	5.13636	48.2517	31.5667	16.466	11.7683	12.56	1242.32	5225.97	5.52998	186.272	1561.92	1562.54	569.056	4.74918	0.515165	0.507116	9.76399	47.4354	1.15107	127.189	267.242
202	F	46	32	26.7	8.8	109	207	41	124.8	74	closed-loop	5	26	69	0	0	973.293	19.1757	14.0299	5.18865	35.9156	22.2107	13.7191	13.2847	13.0675	14.4001	3.02776	0.282526	4.52368	47.401	26.8111	20.5313	10.5141	1.607	1653.3	6960.88	7.05196	502.364	1055.4	1699.62	815.876	5.87431	0.743967	1.22543	19.0734	30.8117	1.49035	163.393	308.476
203	F	23	9	31	8.1	111	149	73	83.4	51	closed-loop	7	28	65	0	0	918.941	17.1935	10.7643	6.41678	34.5268	13.0884	21.456	8.94616	16.7956	17.6449	3.71366	0.377275	4.72665	50.9348	35.0424	15.8324	14.9445	0.99	1385.99	5836.63	6.47407	382.943	1246.42	1740.3	693.72	6.11043	0.617609	0.727999	10.2497	73.9262	1.07144	187.283	463.675
204	M	21	12	24.7	6.8	77	157	67	92.6	51	closed-loop	2	18	78	2	0	1063	13.5392	7.39016	6.13927	30.2039	13.3461	16.9016	7.93246	13.452	14.2149	4.3185	0.288387	5.08875	58.7903	32.8704	25.8972	9.65751	3.68	2465.44	10392.3	5.37835	193.507	1081.11	1233.52	486.457	3.85732	0.348822	0.628691	9.27218	44.6614	0.624635	141.395	299.35
205	F	37	32	22.3	7.7	60	158	35	84	67	closed-loop						690.485	14.5314	8.48034	6.04288	37.7879	17.1343	20.7474	11.001	15.1608	16.5561	5.69479	0.471906	6.75035	50.8709	34.8257	15.9954	10.7301	0	1804.17	7592.36	5.48672	328.01	1313	1224.58	621.562	5.02169	0.488866	0.691729	10.0866	26.5883	0.800921	127.445	254.586
206	F	54	43	23.24	6.8	149	200	68	100.4	86	open-loop						1094.61	17.15	11.4673	5.67766	35.7291	17.7923	18.0034	9.30151	15.2655	16.3274	4.81049	0.382078	6.32114	33.9357	22.4017	11.4588	12.1544	22.905	1121.24	4701.82	6.50353	282.533	938.271	2052.23	685.265	4.8277	0.434342	0.675147	16.9848	115.68	0.927547	186.452	371.558
207	F	25	15	26.82	6.8	132	162	36	76.8	78	closed-loop						449.984	18.7977	12.6605	6.13186	34.4551	11.3021	23.1573	9.60721	15.9878	16.6745	4.5044	0.342121	5.3863	48.1197	36.393	11.6969	8.51072	3.55	1488.94	6265.54	5.50188	259.334	945.312	1201.54	647.46	5.54419	0.496996	0.561471	11.7647	18.4621	1.14846	125.15	298.564
208	M	37	28	33.1	6.2	117	172	79	109.2	47	closed-loop	14	23	63	0	0	960.33	15.5503	8.15856	7.38335	33.3052	12.0446	21.3078	7.49544	14.2932	15.0946	6.51491	0.56098	7.69815	53.1145	36.3553	16.7403	14.6504	3.34	1909.16	8036.57	7.51639	215.529	1040.09	1642.67	590.233	5.30076	0.466174	0.560456	12.2096	77.2905	0.969013	168.655	303.212
209	M	60	37	29.85	8	173	240	285	146	37	closed-loop						1180.69	17.6019	13.2393	4.36598	48.0057	26.1072	21.8975	16.3458	18.7422	20.1153	6.34743	0.449422	7.62706	29.594	18.7855	10.7138	8.7171	25.281	2609.35	10914	5.65351	452.061	1463.78	1370.93	732.305	5.63013	0.455285	0.547645	15.4007	32.8326	0.749994	105.822	350.084
210	M	29	24	23.4	5.9	116	192	71	95.8	82	closed-loop	3	14	81	2	0	1138.48	14.2106	8.41054	5.79039	39.7908	13.7268	26.0676	10.4553	20.4401	21.533	3.4489	0.390851	4.6685	46.3102	32.6851	13.6074	11.2309	9.02	2486.88	10442.5	4.5921	252.561	954.107	1471.65	542.732	4.08946	0.386026	0.390047	9.38123	60.6543	0.872579	135.298	447.637
211	M	46	34	25.5		179	177	83	108.4	52	closed-loop	16	35	48	1	0	1302.05	13.2778	8.96997	4.29761	37.9695	17.193	20.8646	11.264	16.3767	17.8369	4.47264	0.306607	5.76805	43.0477	24.1743	18.8291	8.02715	27.84	2348.28	9855.39	4.85036	319.885	759.539	1357.18	586.642	4.35638	0.276798	0.344933	10.2075	53.5754	0.76226	117.401	303.699
212	F	39	32	39.6	7.8	215	145	106	81.8	42	closed-loop						923.762	19.7906	13.7622	6.02889	41.8045	14.2131	27.6206	9.91503	22.6435	23.6165	3.98148	0.412182	5.11692	40.9953	27.3961	13.4897	12.4035	0	1628.89	6838.57	6.34542	275.012	1233.11	1938.16	636.641	5.61425	0.504638	0.729944	17.7501	79.144	1.11487	173.993	686.686
213	M	32	2	18.2	8.5	148	155	63	64.4	78	open-loop	27	40	33	0	0	1154.87	21.0836	16.1797	4.88086	38.5425	22.5303	16.056	12.6693	14.0017	15.3221	6.0275	0.307159	7.29603	41.3286	27.647	13.6852	10.2874	5.29	2256.16	9482.43	4.99078	504.96	1451.3	1493.9	767.499	5.82849	0.456528	0.607226	12.4947	52.7622	0.93965	131.285	319.086
214	F	38	37	22.5	7.6	47	142	34	88.2	47	open-loop	20	37	43	0	0	873.53	17.1423	10.5708	6.52355	36.214	17.164	19.1041	10.133	17.1045	18.1043	4.09644	0.383703	5.1935	48.9699	32.0966	16.8349	14.6696	1.66	1665.35	7006.93	6.10082	372.823	1166.96	1663.34	646.05	5.1941	0.552436	0.630498	10.178	70.5377	1.06284	160.957	306.794
215	F	67	41	21	7.5	74	126	66	27	73	closed-loop	4	20	74	2	0	662.7	14.9346	8.6324	6.29107	38.3245	18.3352	20.0444	12.15	17.3478	18.5157	3.89461	0.285705	4.89207	49.2326	35.0977	14.0658	10.409	1.35	1795.56	7548.81	5.92016	285.036	1066.64	1336.37	553.437	4.71719	0.384281	0.495667	9.13921	50.9924	0.79084	156.252	1018.68
216	M	30	9	23.4	7.6	120	155	76	83	48	closed-loop	10	20	66	4	0	614.43	14.5432	6.8485	7.68529	28.7797	11.2755	17.5467	8.26727	12.0187	12.8539	5.28737	0.233579	5.92441	60.2838	49.4841	10.7808	8.6432	0	1271.52	5367.16	4.85246	186.926	1175.87	1218.05	506.229	4.93111	0.408959	0.637033	15.2259	19.1346	0.676356	121.996	202.065
217	M	53	40	23.9	6	87	172	47	80	77	closed-loop	5	17	74	4	0	949.107	17.2528	10.6108	6.62569	31.8119	18.8193	13.0345	11.582	12.4373	13.6598	3.08296	0.293234	4.08491	51.9647	40.7224	11.1733	8.21953	6.551	2252.81	9490.72	4.64976	415.585	1391.2	1204.8	721.375	5.71909	0.369317	0.668056	10.8283	26.2526	0.595702	116.158	284.269
218	F	38	36	27.4	6.2	148	166	35	106	50	closed-loop	5	16	73	4	2	690.54	16.0893	11.6508	4.41423	40.3296	21.7233	18.7157	12.2151	18.9002	20.2263	3.4246	0.293928	4.61398	45.8375	24.0732	21.7188	10.8685	0.87	1316.65	5529.93	4.92158	457.289	1106.69	1637.94	667.793	4.71652	0.417727	0.524057	7.86845	84.4568	0.767098	171.283	441.294
219	M	51	20	31.8	6.5	79	137	87	73	45	closed-loop	1	13	84	2	0	595.85	19.9066	14.3363	5.55986	45.4583	19.2132	26.3097	10.6447	21.1251	22.3919	5.95867	0.598213	7.76504	35.0196	25.4586	9.5271	10.2765	3.71	1534.57	6430.75	6.54255	182.344	1480.55	1546	691.321	5.4152	0.501769	0.443121	14.2776	35.5214	1.02309	118.359	190.477
220	F	49	28	31.6	7.7	82	124	42	39	66	closed-loop	5	18	76	1	0	1781.34	21.6073	18.1558	3.4347	42.7807	31.62	11.1758	16.0125	14.862	16.1109	3.42503	0.291412	4.462	35.442	19.3669	16.0482	6.86688	9.06	2378.08	9985.46	4.31861	942.201	1524.94	1790.97	990.581	8.97363	0.357431	0.504609	10.5085	50.587	0.702247	171.601	610.135
221	F	43	38	23.04	8.2	102	203	80	108	79	closed-loop						520.558	20.2434	15.0994	5.13251	55.8771	11.7589	44.1494	11.0882	30.9685	31.9672	7.07145	0.53691	8.23506	24.9817	14.6295	10.0541	11.2228	0.248	491.144	2053.9	7.76554	230.191	810.493	2718.62	727.561	5.85368	0.423501	1.40896	35.8367	100.824	1.43135	209.511	637.011
222	F	47	25	27.3	6.2	48	163	116	91	49	closed-loop	8	27	65	0	0	942.69	16.8461	11.6566	5.17933	33.0513	17.2047	15.8808	10.8183	14.1933	15.4035	3.41479	0.312502	4.51139	53.3185	30.1037	22.6365	9.10991	0.5	1583.99	6676.84	4.79801	515.811	915.056	1614.49	687.795	5.61241	0.448235	0.871218	13.1188	60.1203	0.902783	131.674	302.142
223	M	50	20	22	7.5	148	216	78	144	56	multi-iniettiva	18	26	45	10	1	1257.42	14.9665	9.76359	5.19431	35.2278	19.7156	15.5817	10.9261	14.326	15.7053	3.80945	0.266584	4.87965	49.9547	32.4589	17.4907	11.3331	9.96	2329.47	9801.18	4.76074	298.549	1072.97	1442.91	568.756	5.0827	0.347719	0.56236	10.7106	50.6896	0.721194	121.637	280.897
224	F	58	9	21.8	9.1	218	184	27	94.6	84	multi-iniettiva	19	29	51	1	0	1238.2	14.9775	10.4112	4.55307	35.6909	22.9228	12.798	13.8865	13.7609	14.7775	2.71509	0.287058	3.54637	52.7975	24.1182	28.6261	11.1501	0	1504.92	6337.1	5.30261	591.726	978.025	1729.38	701.898	4.88398	0.385403	0.883768	12.6983	74.3096	0.704356	129.342	688.13
225	M	20	12	23.9	6.6	172	140	41	68.8	63	closed-loop	3	19	73	3	2	699.15	16.8905	9.90516	6.98116	31.4404	22.3718	9.09387	9.59558	12.4449	13.5872	4.86248	0.299763	5.81225	55.0078	48.6381	6.3627	7.26795	0	2852.25	12021.7	5.63765	158.338	1509.17	941.411	510.881	5.26251	0.410202	0.283986	9.23832	25.5167	0.676659	92.1658	98.389
226	M	34	10	27.3	8	182	177	218	93	40	closed-loop	20	29	50	1	0	687.42	20.165	14.0519	6.10329	29.6074	18.5948	11.0625	8.96436	12.3225	13.3772	3.48583	0.299737	4.50161	53.2842	41.1713	12.1079	10.8917	0.5	1621.42	6832.1	5.55069	255.35	1814.92	1353.4	602.423	6.08109	0.43172	0.518064	13.3217	36.172	0.869608	115.96	258.163
227	F	24	18	25.1	8.4	163	180	48	105	65	multi-iniettiva	25	25	47	3	0	1066.78	19.353	15.8873	3.48302	45.2629	25.6197	19.6774	14.5212	19.4723	20.8786	4.51165	0.429681	6.25966	37.8661	16.6621	21.1064	8.32777	0	1843.23	7732.09	4.98581	532.077	878.924	1666.76	792.63	4.88816	0.455722	0.651031	11.2086	71.1143	0.94942	126.674	465.438
228	M	45	22	28.4	5	109	188	303	96	31	closed-loop	0	3	94	3	0	1166.04	20.437	15.242	5.19259	25.2446	13.7826	11.4729	7.04238	10.1453	11.0034	3.00583	0.286012	3.94481	54.3148	31.5057	22.7898	11.0867	7.46	1667.76	7042.65	5.3425	317.498	1280.49	1461.56	703.201	5.34849	0.407733	0.581618	12.5797	48.9399	1.09128	126.931	243.069
229	F	70	8	22.2	7.9	224	183	55	109	63	multi-iniettiva						1209.59	17.0992	10.0102	7.08902	38.095	13.4802	24.6244	9.73677	16.0795	16.8263	6.59171	0.397321	7.43422	47.9552	28.5305	19.4097	16.6056	0	1880.09	7911.77	7.5156	367.642	856.571	1907.46	738.47	6.22311	0.425512	0.515933	10.8505	107.261	0.888255	193.14	302.858
230	F	39	25	19.6	7.6	107	189	52	91.6	87	open-loop						933.77	15.3943	10.3157	5.08741	37.0631	20.6704	16.4076	13.0805	15.6798	16.665	3.68353	0.336667	4.5252	50.7267	30.4475	20.266	10.0725	0	1817.82	7647.2	5.08301	421.917	1138.72	1449.2	626.08	4.75295	0.390578	0.682136	8.16362	74.8919	0.698639	116.464	378.712
231	M	39	8	30.2	7.4	102	177	62	120	45	open-loop						910.998	19.4044	14.2696	5.12161	38.5923	19.4904	19.1399	11.2416	16.6332	17.8311	5.31956	0.374213	6.58768	44.91	34.1921	10.655	9.87408	0	2010.62	8455.02	5.99716	395.625	1251.94	1432.99	714.964	5.73406	0.42375	0.565995	12.9493	36.4067	0.8853	120.093	320.404
232	M	43	40	30.4	7	175	196	74	135.2	46	multi-iniettiva						900.22	16.1367	10.0045	6.12279	31.595	15.1379	16.4943	9.39339	13.5954	14.5263	3.67545	0.329779	4.60627	55.6393	34.8621	20.7466	11.5482	0	1692.04	7131.31	5.56133	376.711	1294.59	1593.6	624.093	5.04716	0.425522	0.591003	9.34375	73.6803	0.827404	144.216	320.542
233	M	46	43	25.2	7.6	119	228	132	156	46	closed-loop						953.789	24.5548	18.672	5.86613	29.6939	19.1533	10.5866	10.1145	10.6318	11.5994	4.24906	0.332885	5.11908	46.4246	29.6165	16.7811	11.1794	4.243	1273.41	5367.42	6.8768	638.269	1294.49	2028.55	1007.41	7.07548	0.558342	0.933712	13.2055	70.1376	0.983971	172.917	503.989
234	M	46	31	28.1	8.2	65	243	72	178.6	50	open-loop						1132.59	15.4707	10.1307	5.32886	38.1786	19.6944	18.5597	12.0812	15.8584	17.1008	4.86404	0.304797	5.88091	47.3523	30.4249	16.7159	9.38202	6.739	2406.52	10112.6	5.28856	370.25	1157.89	1300.33	613.637	4.61663	0.29711	0.394761	10.7454	46.4468	0.609595	120.607	288.691
235	M	40	19	35.3	7.4	125	152	44	81	62	closed-loop						713.24	14.832	9.09792	5.71055	32.3555	19.4441	13.0029	10.9169	12.974	14.5205	3.34829	0.236066	4.42263	52.3178	39.218	13.0805	8.88594	9.36	1868.12	7864.33	4.68921	276.23	1254.59	1127.76	507.987	4.55003	0.321179	0.433591	9.994	35.5545	0.653063	112.594	349.678
236	F	53	34	30.5	9.8	304	240	73	128	99	open-loop						804.48	17.5887	10.1278	7.44756	25.7036	16.0757	9.64286	8.80779	9.93973	10.8973	2.61628	0.280494	3.64072	52.0352	42.9205	9.06155	12.3897	13.825	1264.2	5328.93	6.6469	342.002	1216.93	1858.09	726.651	5.3346	0.496757	0.438222	10.1147	71.5528	1.00222	184.48	529.233
237	F	19	13	21.9	7.5	270	160	86	92	51	open-loop	37	43	20	0	0	1225.06	16.4652	10.5951	5.85945	28.7852	11.2197	17.5993	7.47016	11.9291	12.5709	5.0911	0.497046	5.8246	58.3243	31.5342	26.7193	11.4101	0	1865.02	7869.76	4.84177	489.089	1252.87	1744.17	701.306	5.09378	0.520102	0.884709	10.1393	51.3989	0.986585	120.546	235.735
238	M	45	44	23.9	6.8	120	165	128	87	52	closed-loop	7	23	69	1	0	1488.41	13.222	8.02213	5.18582	27.0589	14.8906	12.1929	8.91396	10.4812	11.2349	4.13825	0.302884	4.74402	55.593	30.9834	24.5	10.1627	26.56	2555.43	10774.2	4.95807	429.212	1229.8	1416.69	584.469	4.26934	0.332625	0.626118	8.99653	57.5559	0.575246	128.562	325.335
239	F	20	12	25.1	6.9	133	173	50	102	61	closed-loop	9	22	68	1	0	973.19	17.8483	12.5242	5.31738	38.2519	20.0391	18.2732	12.1955	16.2255	17.3374	4.40227	0.327026	5.328	45.8708	28.4339	17.2468	10.8282	2.27	1788.85	7520.66	5.34981	406.104	1305.87	1545.32	693.004	4.897	0.475166	0.62051	11.7673	65.5673	0.972692	145.669	373.43
240	F	32	32	23.1	6.7	60	202	65	97		closed-loop	0	17	81	2	0	761.84	20.2361	13.0748	7.14472	28.2436	13.924	14.3506	8.32223	12.4586	13.318	2.93071	0.284415	4.11783	53.841	39.7192	13.7976	10.3667	2.11	1455.62	6139.98	6.09362	293.538	1266.47	1569.38	671.982	5.39289	0.439675	0.693862	15.1619	53.606	0.92057	149.964	243.683
241	F	55	34	31.6	7.8	91	144	55	84	49	closed-loop	8	26	65	1	0	1012.26	20.3226	16.4479	3.85167	47.7059	31.3219	16.4462	16.7675	18.2499	19.5198	5.41123	0.368005	6.75885	34.6213	21.8453	12.7575	7.52135	0	1736.39	7281.23	5.0104	763.043	1324.18	1612.77	918.319	5.49416	0.443449	0.725643	11.0862	30.2006	0.754439	99.9833	364.97
242	M	43	30	25.1		41	182	81	130	36	closed-loop	19	19	61	1	0	657.82	17.8461	10.559	7.27534	38.9523	19.7461	19.2115	12.4743	15.0887	16.0837	5.5306	0.476319	6.58908	45.1668	37.3011	7.81634	10.9436	2.12	1700.54	7148.11	5.72171	545.862	1238.29	1319.12	715.079	5.83344	0.435156	0.599809	12.5019	61.1159	0.740941	160.037	422.019
243	F	35	21	20.2	6.4	83	140	30	86	48	closed-loop						708.23	16.5601	9.57235	6.98068	23.8126	9.51255	14.3306	6.81469	11.2998	11.9684	2.43154	0.225399	2.99331	63.483	44.5029	18.7702	12.8327	0	1297.7	5486.56	6.38285	431.637	1125.3	1520.14	631.076	5.03045	0.312092	0.558682	9.7388	78.4043	0.792173	140.741	258.813
244	F	44	37	29.3	8.5	136	151	68	66	71	closed-loop						877.498	18.28	14.376	3.88097	37.3564	22.0209	15.378	11.3722	16.2311	17.5373	3.7013	0.335581	5.02522	38.0816	21.8104	16.1088	9.26034	14.929	1271.23	5337.03	6.44416	289.095	1254.46	1691.75	662.847	6.17828	0.40512	0.668645	15.6014	63.3246	0.840133	134.179	336.051
245	F	60	39	20.6	7.4	106	189	85	56	116	closed-loop						952.455	16.6587	10.9031	5.7494	34.3459	12.7721	21.6022	8.85739	17.1136	17.9975	4.38268	0.346909	5.21696	51.7777	32.2528	19.4861	11.302	0.99	1486.56	6262.16	5.6271	414.716	1045.41	1621.55	680.827	5.53427	0.474251	0.877869	12.5579	50.652	0.819344	124.505	348.042
246	F	34	31	22	6.5	115	165	77	104	46	closed-loop	0	15	83	2	0	558.98	18.0506	11.9188	6.12758	48.5277	15.1188	33.4377	12.7331	24.0483	25.1405	4.17731	0.488631	5.74859	31.3746	19.1066	12.2296	11.9975	5.56	939.36	3933.52	6.83444	443.462	881.866	1828.4	822.677	5.83376	0.425822	0.510986	13.4453	66.0343	0.798416	192.514	435.818
247	F	27	19	29	9	211	191	66	128	50							1168.39	16.8403	12.7752	4.06149	46.6501	22.5104	24.1753	12.9046	21.2112	22.4678	6.78942	0.429936	8.11017	35.0354	16.8078	18.1099	9.41555	9.826	1919.59	8040.15	6.19611	324.696	1177.36	1707.79	628.043	4.94949	0.452701	0.660037	13.3664	70.0655	0.892899	146.159	507.933
248	F	36	26	24.8	8.4	127	142	41	76	58	multi-iniettiva						996.156	17.1917	10.5502	6.63179	33.7545	16.4058	17.4352	11.2398	14.5411	15.7518	3.48513	0.43071	4.45279	52.4164	30.0071	22.3178	13.7703	0	1414.64	5961.8	6.00789	669.908	943.877	2079.65	819.293	5.53427	0.475033	0.995306	10.5023	78.6518	0.928858	191.799	473.54
249	F	26	4	19.5	8.1	138	170	50	102	58	multi-iniettiva						849.02	14.0252	8.56216	5.44375	37.9277	18.6239	19.3515	12.1748	15.4491	16.5622	5.36627	0.355153	6.18918	50.2988	33.1995	17.0589	10.4188	2.51	2077.98	8739.14	4.96155	308.964	1078.65	1317.26	572.426	4.10495	0.413863	0.54861	10.2359	57.6762	0.79404	130.781	280.623
250	M	38	23	32.8	6.6	73	169	117	113	33	closed-loop	1	14	83	2	0	826.35	23.573	18.8268	4.74331	38.0407	24.3914	13.6937	13.5923	13.4656	15.1124	3.6546	0.310356	5.34572	41.0486	20.3807	20.651	7.59351	0	1420.95	5977.66	6.43232	277.561	1516.53	1690.02	764.017	7.26978	0.654492	0.598191	15.4615	50.6633	1.15416	124.649	172.476
251	F	19	16	24.9	7.6	36	144	67	86	45	open-loop	34	32	32	1	0	1419	16.7375	10.7555	5.97155	41.2376	15.9209	25.3342	10.0565	18.0374	18.9261	7.02202	0.578835	8.10368	44.2487	23.8368	20.2144	11.7781	0.87	1539.3	6466.37	5.79484	357.065	1016.01	1687.73	700.097	4.48905	0.500227	0.565192	10.8231	108.16	0.864029	184.668	346.437
252	F	55	23	41.8	9.6	124	205	68	122.4	69	open-loop						465.173	20.2866	14.2085	6.08653	40.8828	20.7251	20.1924	11.7279	19.0342	20.3532	4.44726	0.379442	5.87389	40.3342	33.7344	6.55637	9.66186	1.62	1086.33	4562.94	6.26511	278.666	1031.93	1534.53	698.846	6.18227	0.548635	0.61031	15.2891	44.7395	0.970237	151.648	381.355
253	M	41	14	29.3	6.5	142	111	129	58.2	27	open-loop						765.221	14.5958	9.86368	4.72048	29.0798	15.9248	13.2244	10.3929	11.0622	12.0603	3.39385	0.192187	4.14677	60.0763	32.6498	26.8635	7.08752	0	1648.39	6957.37	4.82652	315.233	943.189	987.517	554.386	4.96848	0.291193	0.27542	6.85335	27.963	0.657004	78.789	198.973
254	F	26	10	22.6	6.3	73	226	48	134	82	open-loop						708.744	13.6696	8.26126	5.37944	47.0452	15.8054	31.2982	13.2556	22.0937	23.097	5.79254	0.545267	7.01237	41.8888	18.0514	23.685	13.6251	0	1218.12	5106.45	5.90993	401.761	876.272	1855.58	627.497	3.99715	0.492563	0.596822	7.83257	56.1283	1.10334	156.443	591.099
255	M	21	3	26.1	7.8	100	160	89	94.2	48	closed-loop						1035.29	15.7936	10.9929	4.80042	39.4638	21.2242	18.2816	11.8658	17.3937	18.7957	4.74453	0.320969	5.90454	44.5515	31.1442	13.3547	6.35875	10.546	2506.78	10531.5	4.61907	240.056	869.781	1189.42	566.254	5.28087	0.41647	0.421257	9.24173	38.2901	0.81459	107.536	223.678
256	M	35	10	22.5	6.8	105	163	41	105.8	49	closed-loop	1	14	84	1	0	549.57	17.4808	13.3173	4.15512	35.2445	23.7883	11.5451	13.1127	12.9731	14.5154	2.55146	0.241183	3.77642	47.8304	31.3087	16.4879	6.36808	4.93	1418.01	5967.35	4.56978	371.436	1028.52	1175.85	661.279	5.55708	0.33145	0.465441	8.24395	25.9025	0.669953	110.218	339.412
257	M	45	15	20.9							closed-loop	5	20	72	3	0	1147.43	17.3129	11.8547	5.44928	38.9141	16.9372	22.0417	10.0398	18.5208	19.5517	4.86551	0.398404	6.23503	45.0219	25.0795	19.8959	13.2912	3.82	1807.21	7596.19	6.3302	407.794	744.656	1937.23	705.103	5.20692	0.498005	0.741474	10.3917	96.2257	0.918543	175.503	499.809
258	M	49	33	19.5	7.7	124	176	35	91	78	closed-loop	3	25	71	1	0	988.591	18.0345	13.0616	4.95865	32.1227	14.6965	17.5035	8.04335	14.3917	15.5025	4.07793	0.271367	5.26044	39.2255	27.2216	11.9528	11.8712	26.564	1455.96	6117.32	7.54347	222.344	1214.95	1574.79	696.328	6.09082	0.326245	0.452622	12.0972	49.0013	0.710871	124.055	409.654
259	M	59	30	31.8	7.6	99	152	39	92	52	open-loop	14	29	56	1	0	888.29	20.0421	14.2129	5.82203	40.1532	19.7823	20.4031	12.374	18.2104	19.3873	3.77267	0.403063	4.91737	41.116	26.5843	14.521	12.3337	2.1	1116.45	4693.53	6.52067	668.404	1324.68	2049.61	920.901	6.09073	0.546375	1.18232	17.4929	64.6514	0.91361	171.687	521.546
260	F	47	29	29.8		92	164	46	85	70	closed-loop	10	26	63	1	0	886.347	19.5964	14.3532	5.24582	45.7387	18.5269	27.211	12.3711	23.1489	24.3801	4.44613	0.479277	5.66631	36.1928	19.4632	16.7185	14.5981	0.998	1228.1	5148.12	6.90253	449.628	969.759	2073.94	727.091	6.75433	0.531715	0.823222	12.9875	94.4776	1.14486	178.13	492.133
261	F	32	8	22.9	9.3	162	188	86	106	65	closed-loop	17	43	40	0	0	894.833	16.9178	10.9805	5.94264	44.0353	18.3374	25.7901	12.783	22.4042	23.7978	3.70886	0.327952	4.74279	41.3997	31.9772	9.37867	9.15197	0	2157.02	9052.85	5.75794	373.203	864.003	1307.4	642.718	4.70927	0.347238	0.554468	12.2354	46.4339	0.69633	137.071	449.08
262	M	43	10	27.8							multiniettiva						1078.93	16.3752	12.1404	4.22533	41.1267	23.5893	17.6163	12.8039	16.2323	17.6216	5.71998	0.283215	7.05758	44.1966	26.1782	17.9981	8.75561	3.214	2052.86	8624.16	6.28685	354.903	1274.91	1447.07	663.924	5.46799	0.399931	0.747252	12.6224	42.5368	0.718998	125.772	991.433
263	F	33	5	23.7	7.6	128	190	58	115.4	63	closed-loop	3	33	64	0	0	760.95	21.3702	17.3376	4.02605	47.6991	26.9347	20.8874	17.8367	19.49	21.3401	3.54767	0.226342	4.95492	33.0066	20.7338	12.2225	7.80169	0	1829.09	7664.76	5.89364	687.298	1379.13	1209.99	832.988	6.06312	0.267893	0.481114	11.8256	37.6854	0.694334	140.458	439.754
264	F	28	8	29.8	7.8	277	204	102	126.6	57	multiniettiva	20	38	42	0	0	863.77	18.8232	14.0874	4.72221	37.9667	22.6354	15.4383	11.501	13.569	14.7761	7.57398	0.565375	8.74548	43.7834	32.4805	11.2916	7.66849	5.29	1766.97	7428.37	5.04819	384.608	1501.45	1407.34	654.731	4.91802	0.401818	0.735723	14.1372	34.7544	0.831933	120.313	278.386
265	M	35	11	24.7	7	104	193	78	90	53	open-loop						943.94	22.5651	17.5964	4.97621	47.9808	19.8131	28.2019	10.906	21.8576	23.1618	9.21459	0.489774	10.5415	29.2726	15.3488	13.906	9.37785	4.24	1580.32	6614.76	7.70097	208.167	676.509	1899.27	712.577	6.97327	0.556849	0.6138	15.7626	74.9215	1.19596	171.579	275.805
266	M	46	3	22	7.8	132	186	175	113	62	closed-loop	6	22	72	0	0
267	F	23	15	32	7.7						closed-loop	17	28	55	0	0	1227.2	16.8793	12.9624	3.88854	41.6563	20.5316	21.1964	12.4193	19.1106	20.4122	4.31889	0.402034	5.65635	44.1628	20.8739	23.2587	9.9027	0	2261	9497.22	4.70146	397.444	1062.53	1613.77	719.92	4.14418	0.468819	0.663423	11.6055	50.9332	1.02167	123.976	529.146
268	F	33	26	31.9	7.6	153	192	58	117.4	63	closed-loop	5	23	71	1	0	643.57	20.5149	14.0605	6.44612	33.9304	21.5722	12.3767	13.1755	13.3752	14.4573	2.47999	0.246141	3.511	48.4832	36.1771	12.304	9.66505	0	1937.91	8162.21	4.73706	571.157	1552.55	1194.83	771.512	5.94971	0.5315	0.552141	10.2224	35.4918	0.712107	132.958	494.295
269	F	46	35	28.7	7.1	128	175	51	115	60	closed-loop	6	22	71	1	0	913.89	19.4583	16.2872	3.15485	49.7804	35.5974	14.2472	17.5811	19.1291	20.8602	6.09547	0.448802	7.55179	32.3932	19.5763	12.7619	5.77032	0.87	1965.23	8229.78	4.1471	461.849	1948.18	1354.72	706.101	5.77541	0.442696	0.620792	9.87671	41.2064	0.6615	100.899	512.49
270	F	41	30	28.5	7.6	67	230	78	160	54	closed-loop	0	0	86	13	1	1441.32	16.0418	9.70933	6.32083	37.3552	12.5822	24.7556	8.49832	12.8736	13.6608	10.7947	0.452316	11.6515	49.6504	33.0094	16.5907	14.3475	0	2069.35	8707.51	6.3015	352.444	1187.13	1703.27	588.813	4.98224	0.401092	0.686206	13.3327	68.7414	0.91333	158.48	523.735
271	M	25	2	19.2	8.1						closed-loop	15	31	54	0	0	904.98	14.0952	7.88585	6.19034	33.0066	14.4187	18.6268	9.14407	14.3604	15.1039	4.78419	0.439881	5.52381	54.9587	38.3306	16.4862	9.66267	4.44	2311.99	9737.64	5.06058	350.131	1113.65	1267.66	575.154	4.6886	0.415227	0.631491	8.02339	35.4759	0.804502	128.257	735.924
[truncated: 90 more columns]
